# Supplementary material for: Tuning redox potentials of bis(imino)pyridine cobalt complexes: an experimental and theoretical study involving solvent and ligand effects
Source: Royal Society of Chemistry journal article supplement (doi:10.1039/c2dt12195f), 2012-01-01
Supplement: c2dt12195f.pdf [file c2dt12195f.pdf]

## Supporting information for:

### Tuning redox potentials of bis(imino)pyridine cobalt complexes: an experimental-theoretical study involving solvent and ligand effects

C. Moyses Araujo<sup>1\*</sup>, Mark D. Doherty<sup>2\*</sup>, Steven J. Konezny<sup>1</sup>, Oana R. Luca<sup>1</sup>, Alex Usyatinsky<sup>2</sup>, Hans Grade<sup>2</sup>, Emil Lobkovsky<sup>3</sup>, Grigorii L. Soloveichik<sup>2\*</sup>, Robert H. Crabtree<sup>1</sup>, Victor S. Batista<sup>1\*</sup>

<sup>1</sup>Yale University, Department of Chemistry, New Haven, CT 06520, <sup>2</sup>General Electric Global Research, 1 Research Circle, Niskayuna, NY 12309, and <sup>3</sup>Department of Chemistry and Chemical Biology, Cornell University, Ithaca, NY 14853

carlos.araujo@yale.edu, doherty@ge.com, soloveichik@ge.com, victor.batista@yale.edu

#### Table of contents:

|                                                                                                                          |    |
|--------------------------------------------------------------------------------------------------------------------------|----|
| Figure S1: Overlay of CV's of <b>2f</b> and <b>4f</b> in dichloromethane. ....                                           | S2 |
| Table S1: Electrochemical data for <b>2a-d</b> , <b>f</b> , <b>g</b> and <b>3a</b> .....                                 | S3 |
| Figure S2: <sup>1</sup> H NMR spectrum of <b>2b</b> in CD <sub>3</sub> CN at 24°C.....                                   | S4 |
| Figure S3: <sup>1</sup> H NMR spectrum of <b>2g</b> in CD <sub>3</sub> CN at 24°C.....                                   | S4 |
| Figure S4: <sup>1</sup> H NMR spectrum of <b>4b</b> in CD <sub>3</sub> CN at 24°C. ....                                  | S5 |
| Figure S5: a.) High field and b.) low field <sup>1</sup> H NMR spectrum of <b>4c</b> in CD <sub>3</sub> CN at 22°C. .... | S6 |
| Figure S6: <sup>1</sup> H NMR spectrum of <b>4d</b> in CD <sub>3</sub> CN at 24°C. ....                                  | S7 |
| Figure S7: <sup>1</sup> H NMR spectrum of <b>4f</b> in CD <sub>3</sub> CN at 24°C. ....                                  | S7 |
| Figure S8: <sup>1</sup> H NMR spectrum of <b>4g</b> in CD <sub>3</sub> CN at 24°C.....                                   | S8 |
| Table S2: Energetics of the complexes in the gas phase. ....                                                             | S8 |
| Table S3: Gibbs free energies in the three solvents.....                                                                 | S9 |

|                                                                                                                                                     |     |
|-----------------------------------------------------------------------------------------------------------------------------------------------------|-----|
| Table S4: Hydration energy of H <sub>2</sub> O and the experimental solvation energies of Cl <sup>-</sup> .....                                     | S10 |
| Figure S9: Optimized structures of <b>2d</b> and <b>2d</b> <sup>+</sup> .....                                                                       | S10 |
| Figure S10: Optimized structures of <b>2d(solv)</b> <sup>+</sup> for H <sub>2</sub> O, CH <sub>2</sub> Cl <sub>2</sub> and CH <sub>3</sub> CN ..... | S11 |
| Figure S11: Optimized structure of [( <b>1f</b> ) <sub>2</sub> Co] <sup>2+</sup> (R=OCH <sub>3</sub> ).....                                         | S11 |
| References.....                                                                                                                                     | S11 |
| Appendix: Cartesian coordinates of the optimized complexes.....                                                                                     | S12 |

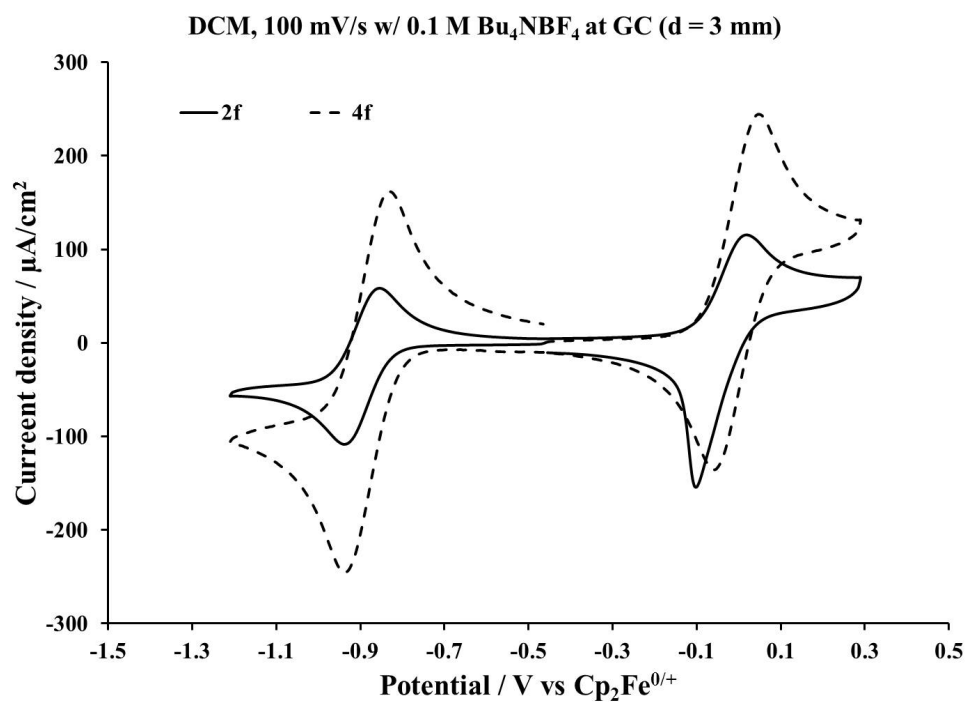

Figure S1. Cyclic voltammograms of 1 mM solutions of **2f** (—) and **4f** (- -) in dichloromethane with 0.1 M [Bu<sub>4</sub>N][BF<sub>4</sub>] as supporting electrolyte and  $\nu = 0.1$  V/s at a glassy carbon working electrode (d = 3 mm).

Table S1: Electrochemical data for **2a-d**, **f**, **g** and **3a** in acetonitrile and dichloromethane (0.1 M [Bu<sub>4</sub>N][BF<sub>4</sub>] supporting electrolyte) vs. Cp<sub>2</sub>Fe<sup>0/+</sup> at 0.1 V/s at a glassy carbon working electrode (d = 3 mm).

|           | CH <sub>3</sub> CN                       |                 | CH <sub>2</sub> Cl <sub>2</sub>          |                 |
|-----------|------------------------------------------|-----------------|------------------------------------------|-----------------|
|           | <i>E</i> <sub>red</sub> (V) <sup>a</sup> | Δ <i>E</i> (mV) | <i>E</i> <sub>red</sub> (V) <sup>a</sup> | Δ <i>E</i> (mV) |
| <b>2a</b> | -2.23                                    | 76              | -1.34 <sup>b</sup>                       | N/A             |
|           | -1.50                                    | 76              |                                          |                 |
|           | -1.01                                    | 124             |                                          |                 |
| <b>3a</b> | -0.88                                    | 160             | +0.31 <sup>b</sup>                       | N/A             |
|           | -1.47                                    | 75              | -1.28 <sup>b</sup>                       | N/A             |
|           |                                          |                 | -1.65 <sup>b</sup>                       | N/A             |
|           |                                          |                 | -1.83 <sup>b</sup>                       | N/A             |
| <b>2b</b> | +0.07 <sup>b</sup>                       | N/A             | +0.14 <sup>b</sup>                       | N/A             |
|           | -0.65                                    | 70              | -1.18                                    | 110             |
|           | -1.10                                    | 95              |                                          |                 |
|           | -1.55                                    | 95              |                                          |                 |
|           | -1.94 <sup>b</sup>                       | N/A             |                                          |                 |
|           |                                          |                 |                                          |                 |
| <b>2c</b> | +0.13 <sup>d</sup>                       | N/A             | +0.03 <sup>b</sup>                       | N/A             |
|           | -0.69                                    | 70              | -1.22                                    | 120             |
|           | -1.11                                    | 120             |                                          |                 |
|           |                                          |                 |                                          |                 |
| <b>2d</b> | -0.88                                    | 75              | -0.08 <sup>b</sup>                       | N/A             |
|           |                                          |                 | -1.26                                    | 140             |
| <b>2f</b> | -0.94                                    | 75              | -0.90                                    | 85              |
|           | -1.95 <sup>b</sup>                       | N/A             |                                          |                 |
| <b>2g</b> | -1.13 <sup>b</sup>                       | N/A             | -1.02                                    | 75              |
|           | -1.37 <sup>b</sup>                       | N/A             |                                          |                 |
|           | -1.61 <sup>b</sup>                       | N/A             |                                          |                 |
|           | -2.06 <sup>b</sup>                       | N/A             |                                          |                 |

<sup>a</sup> half wave potentials, *E*<sub>1/2</sub>, unless otherwise indicated. <sup>b</sup> irreversible reduction, *E*<sub>PC</sub>.

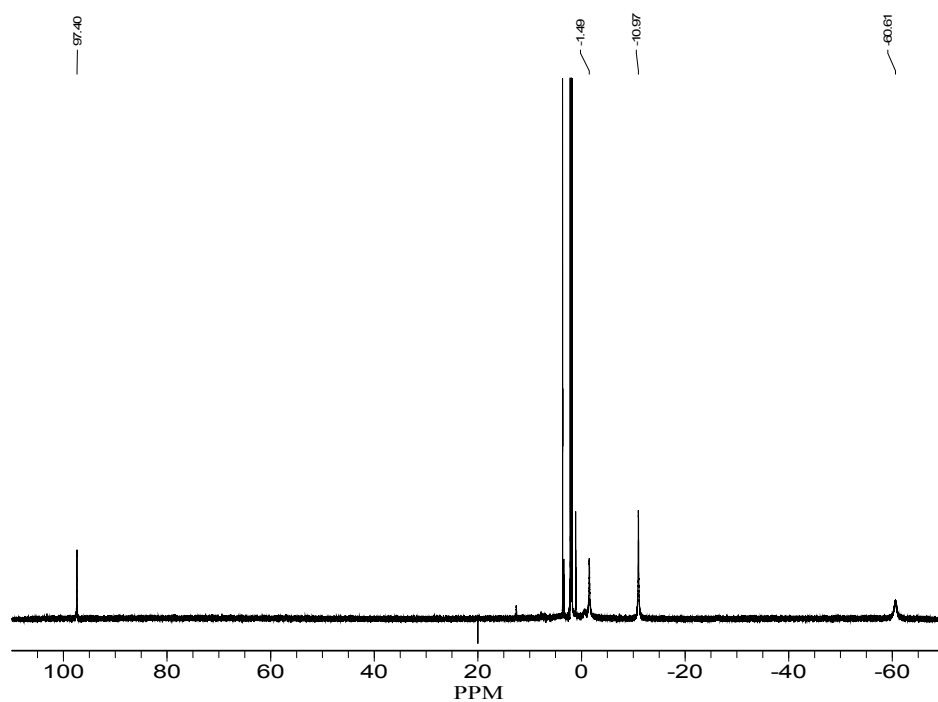

Figure S2.  $^1\text{H}$  NMR spectrum of **2b** in  $\text{CD}_3\text{CN}$  at  $24^\circ\text{C}$ .

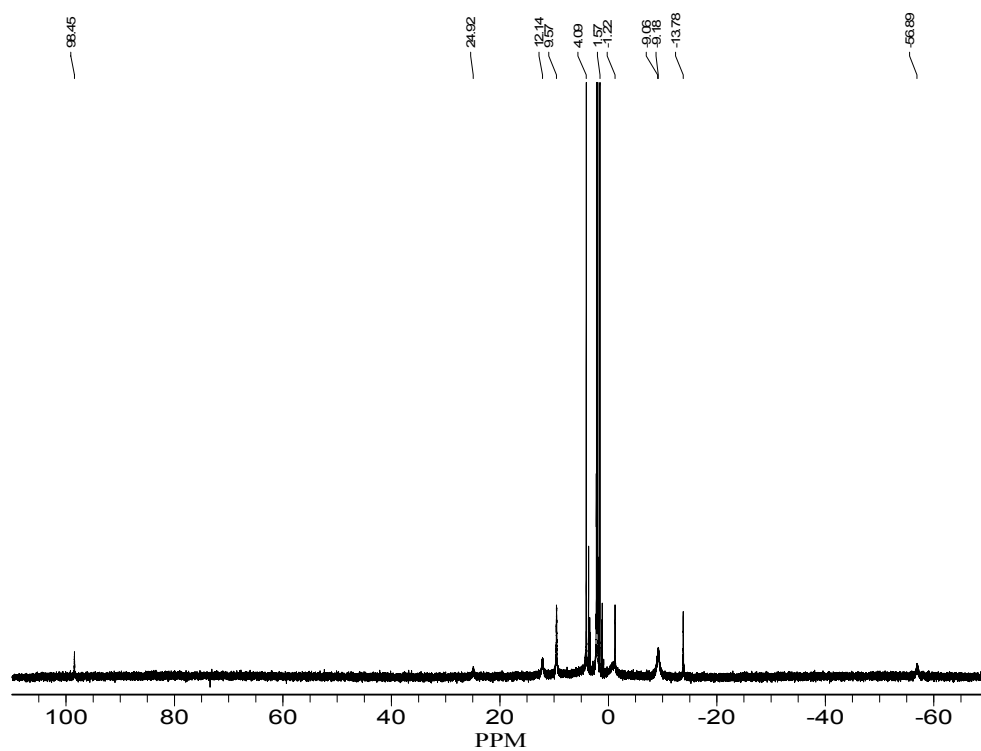

Figure S3.  $^1\text{H}$  NMR spectrum of **2g** in  $\text{CD}_3\text{CN}$  at  $24^\circ\text{C}$ .

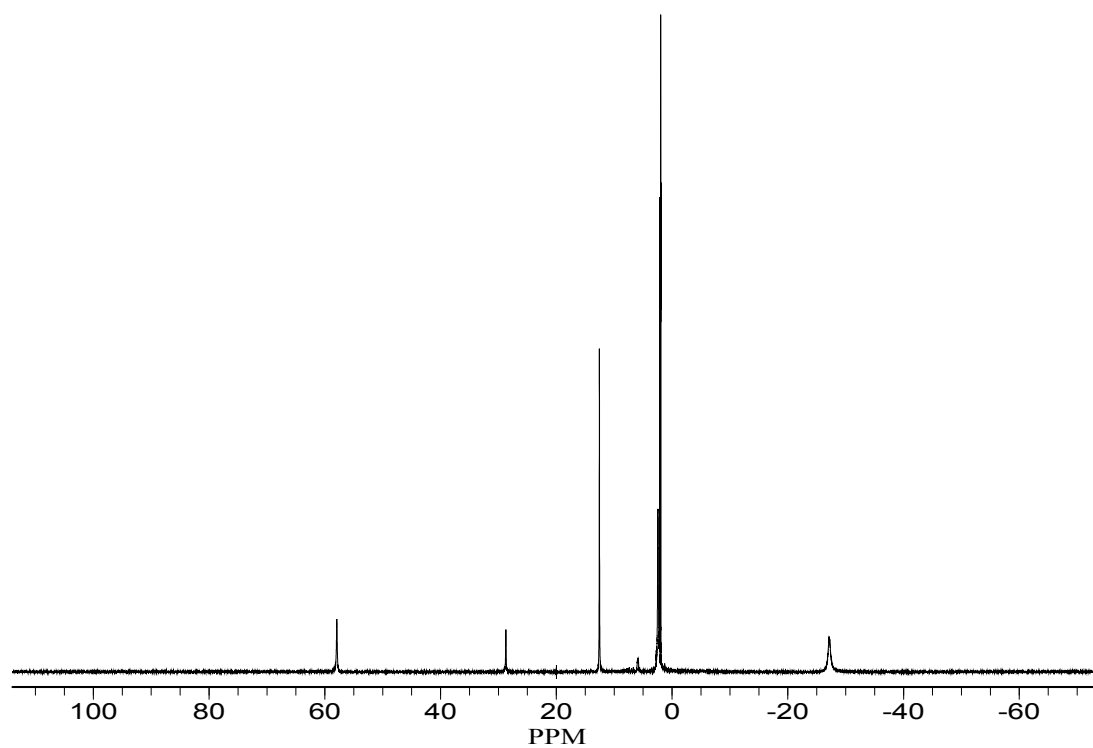

Figure S4. <sup>1</sup>H NMR spectrum of **4b** in CD<sub>3</sub>CN at 24°C.

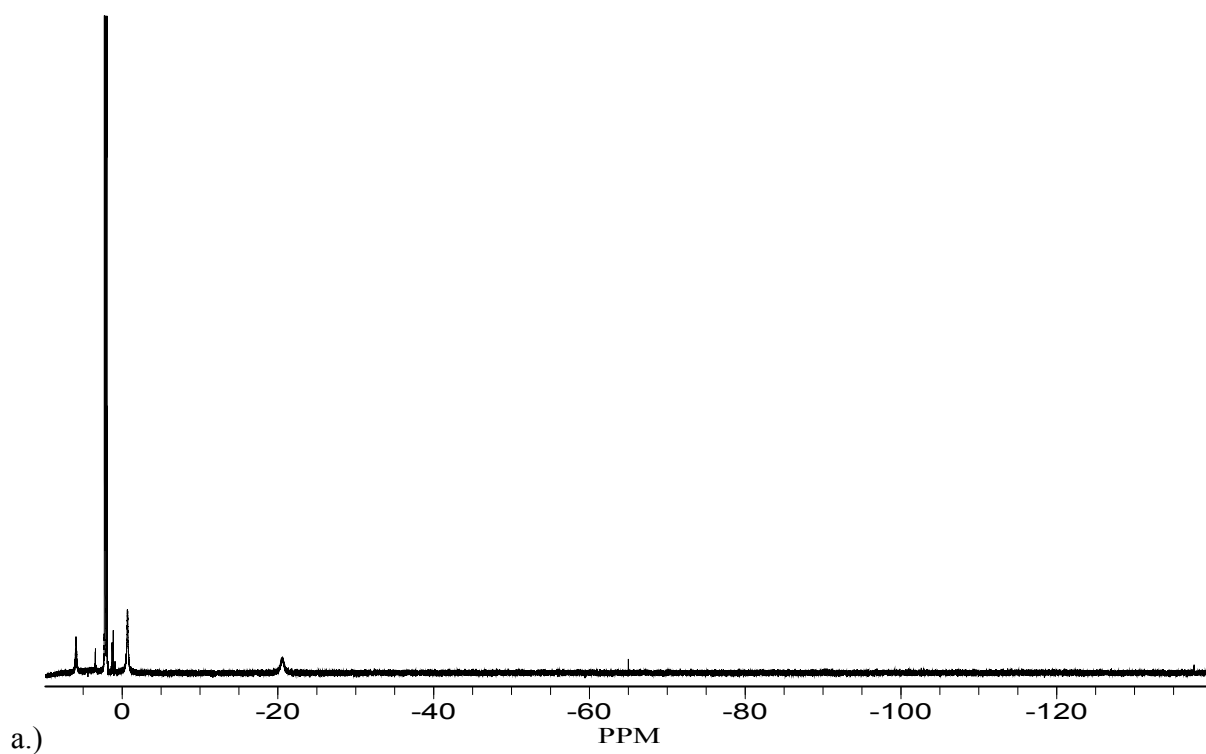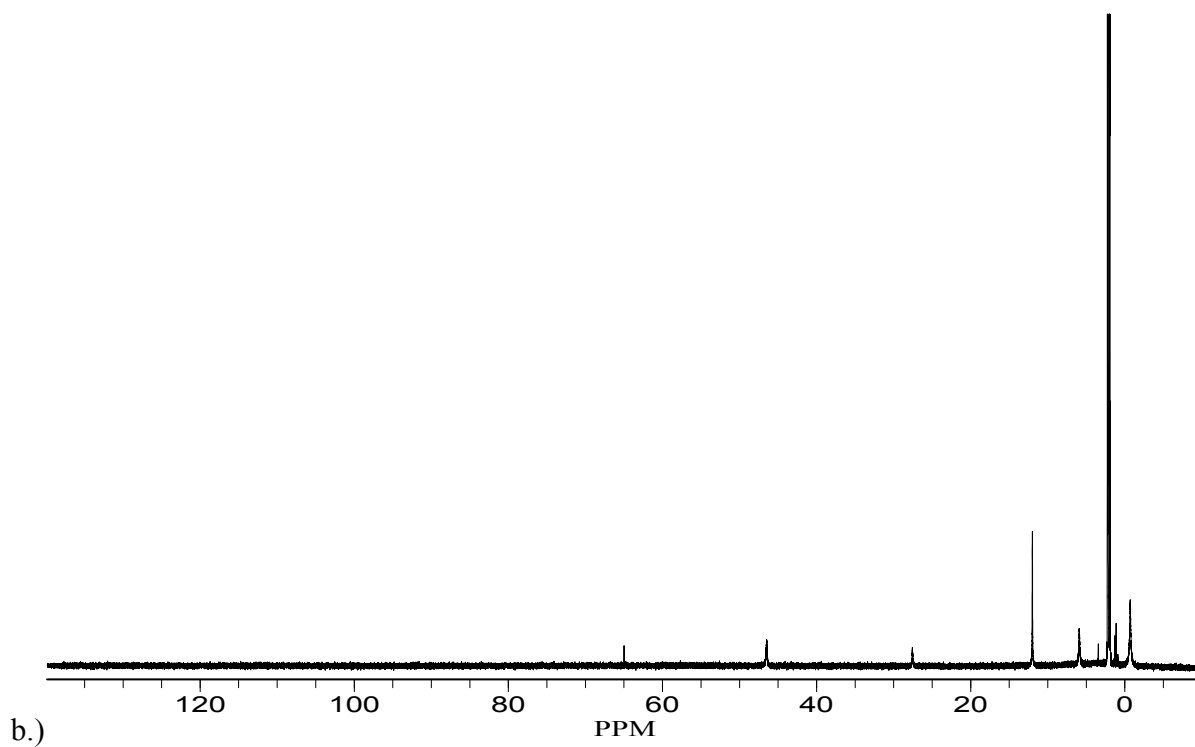

Figure S5. a.) High field and b.) low field  $^1\text{H}$  NMR spectrum of **4c** in  $\text{CD}_3\text{CN}$  at  $22^\circ\text{C}$ .

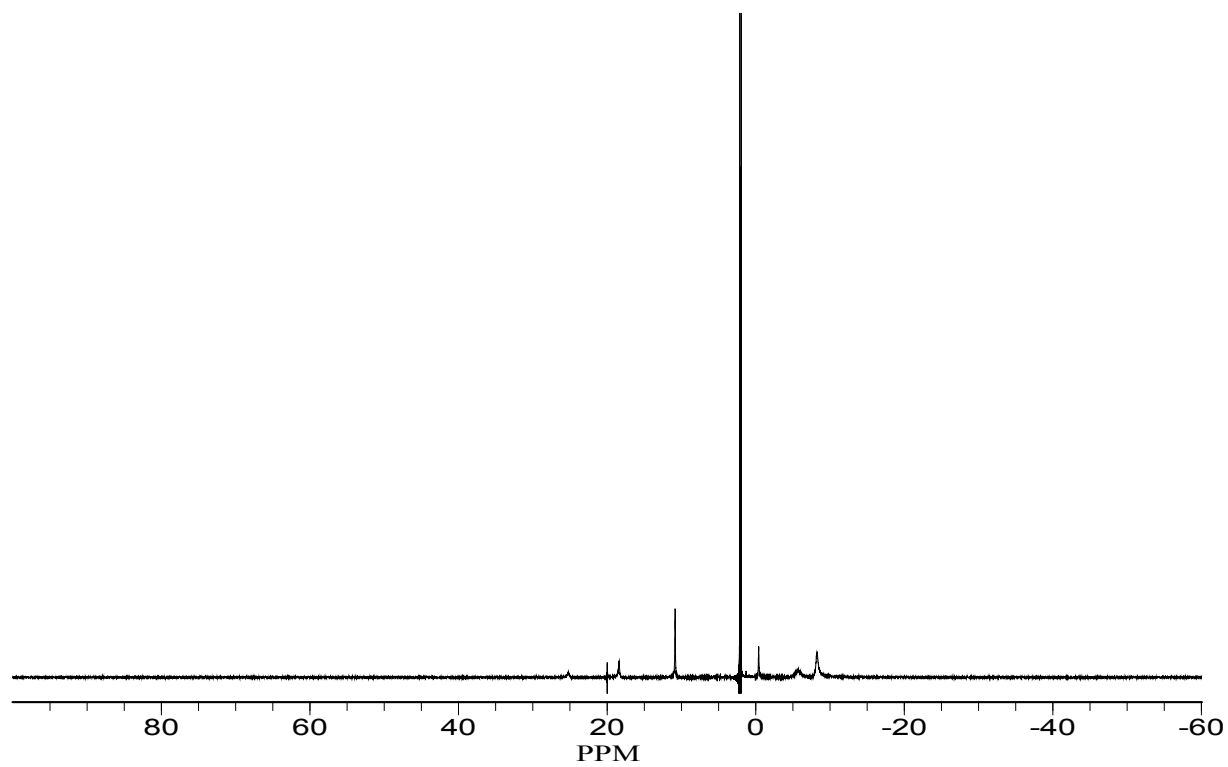

Figure S6. <sup>1</sup>H NMR spectrum of **4d** in CD<sub>3</sub>CN at 24°C.

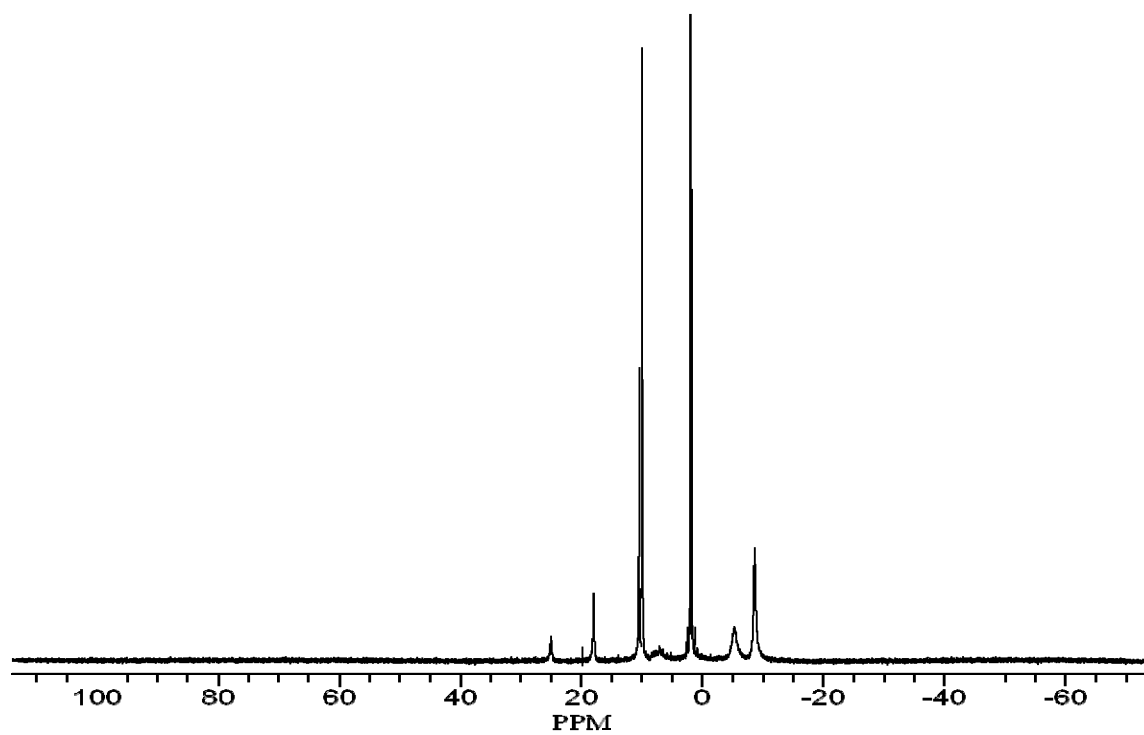

Figure S7. <sup>1</sup>H NMR spectrum of **4e** in CD<sub>3</sub>CN at 24°C.

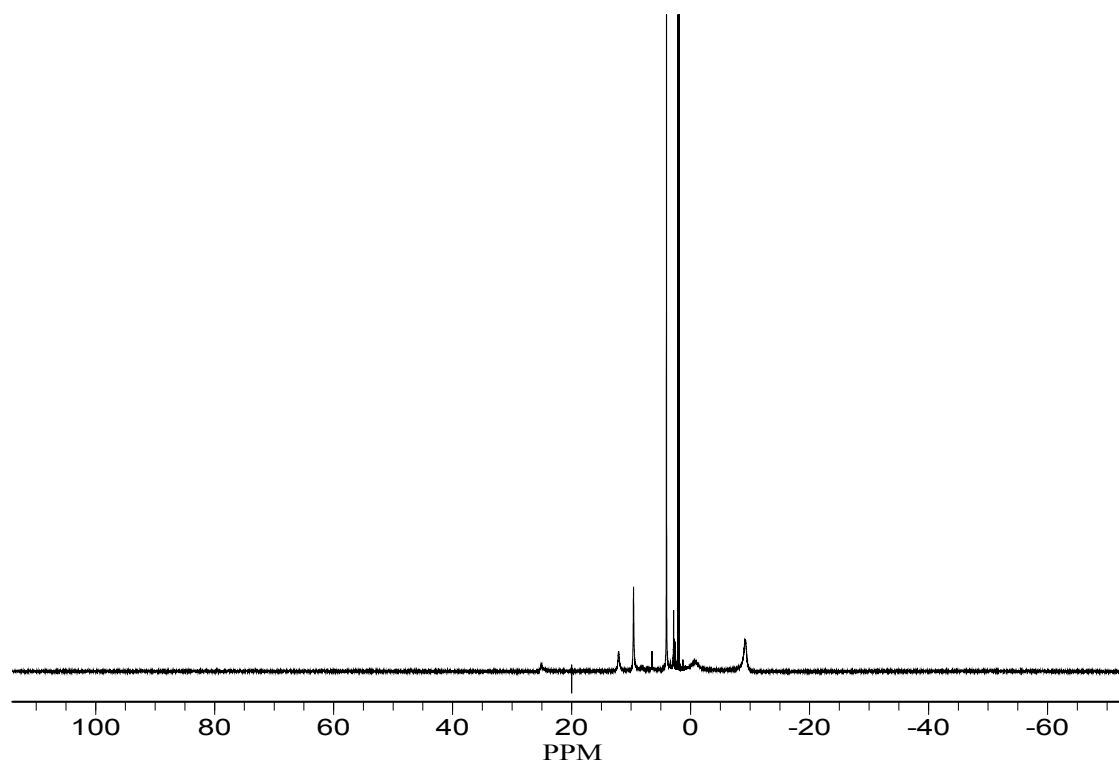

Figure S8.  $^1\text{H}$  NMR spectrum of **4g** in  $\text{CD}_3\text{CN}$  at  $24^\circ\text{C}$ .

Table S2. Gas phase zero point energy (ZPE), entropy (S), Enthalpy ( $H_g$ ) and Gibbs free energies ( $G_g$ ) of investigated complexes, molecules and ions, which are relevant for the construction of the diagram in Figure 6.

| Complexes/energetics                        | ZPE<br>(kcal/mol) | S<br>(cal mol $^{-1}$ K $^{-1}$ ) | $H_g$<br>(kcal/mol) | $G_g$<br>(kcal/mol) |
|---------------------------------------------|-------------------|-----------------------------------|---------------------|---------------------|
| <b>2d</b> R=H                               | 224.710           | 178.947                           | -1281077.574        | -1281130.927        |
| <b>2f</b> R=OCH $_3$                        | 265.347           | 203.456                           | -1424810.345        | -1424871.014        |
| <b>2b</b> R=CN                              | 222.466           | 198.542                           | -1396872.453        | -1396931.649        |
| <b>2d(DCM)</b>                              | 243.507           | 208.338                           | -1883333.084        | -1883395.200        |
| <b>2d(AN)</b>                               | 253.899           | 201.974                           | -1364384.744        | -1364444.962        |
| <b>2d<math>^+</math></b>                    | 226.578           | 168.217                           | -1280921.161        | -1280971.315        |
| <b>2d(AN)<math>^+</math></b>                | 256.539           | 195.457                           | -1364250.930        | -1364309.205        |
| <b>2d(H<math>_2</math>O)<math>^+</math></b> | 242.092           | 182.196                           | -1328908.713        | -1328963.035        |



|                                               |         |         |              |              |
|-----------------------------------------------|---------|---------|--------------|--------------|
| <b>2d(DCM)<sup>+</sup></b>                    | 245.498 | 200.147 | -1883181.091 | -1883240.765 |
| <b>5d</b>                                     | 237.495 | 183.383 | -1040106.89  | -1040161.561 |
| <b>6d</b>                                     | 236.747 | 171.456 | -751075.102  | -751126.221  |
| <b>7d</b>                                     | 255.606 | 183.425 | -799056.735  | -799111.423  |
| <b>L<sub>2</sub>Co<sup>II</sup> – bis NNN</b> |         |         |              |              |
| R=OCH <sub>3</sub>                            | 529.498 | 303.821 | -1602988.279 | -1603078.863 |
| R=H                                           | 448.490 | 252.681 | -1315514.876 | -1315590.213 |
| R=CN                                          | 443.422 | 294.157 | -1547080.848 | -1547168.551 |
| <b>L<sub>2</sub>Co<sup>III</sup> – R=H</b>    | 449.261 | 246.707 | -1315252.784 | -1315326.34  |
| [CoCl <sub>4</sub> ] <sup>2-</sup>            | 2.169   | 94.401  | -1246401.121 | -1246429.266 |
| [CoCl <sub>4</sub> ] <sup>-</sup>             | 2.619   | 94.254  | -1246388.938 | -1246417.04  |
| H <sub>2</sub> O                              | 13.417  | 45.141  | -47962.682   | -47976.141   |
| Cl <sup>-</sup>                               |         |         | -288839.644  | -288850.577  |

Table S3. Total Gibbs free energies of R =H complexes. It is obtained from the sum of the gas phase Gibbs free energy (Table S2) and the solvation energy.

| Complex/solvents                           | Gibbs free energies (kcal/mol) |               |              |
|--------------------------------------------|--------------------------------|---------------|--------------|
|                                            | H <sub>2</sub> O               | ACN           | DCM          |
| <b>2d</b>                                  | -1281161.19                    | -1281162.892  | -1281158.741 |
| <b>2d</b> R=H                              | -1281161.190                   | -1281162.892  | -1281158.741 |
| <b>2f</b> R=OCH <sub>3</sub>               | -1424903.300                   | -1424905.296  | -1424899.980 |
| <b>2b</b> R=CN                             | -1396974.070                   | -1396975.720  | -1396969.631 |
| <b>2d(DCM)</b>                             |                                |               | -1883417.894 |
| <b>2d(AN)</b>                              |                                | -1364478.9572 |              |
| <b>2d<sup>+</sup></b>                      | -1281020.962                   | -1281022.058  | -1281016.452 |
| <b>2d(AN)<sup>+</sup></b>                  |                                | -1364359.755  |              |
| <b>2d(H<sub>2</sub>O)<sup>+</sup></b>      | -1328959.519                   |               |              |
| <b>2d(DCM)<sup>+</sup></b>                 |                                |               | -1883283.899 |
| <b>5d</b>                                  | -1040215.682                   | -1075549.001  |              |
| <b>6d</b>                                  | -751289.350                    |               |              |
| <b>7d</b>                                  | -799264.136                    |               |              |
| <b>L<sub>2</sub>Co – bis NNN</b>           |                                |               |              |
| R=OCH <sub>3</sub>                         | -1603198.525                   | -1603200.447  | -1603188.159 |
| R=H                                        | -1315711.422                   | -1315712.398  | -1315700.850 |
| R=CN                                       | -1547334.803                   | -1547333.956  | -1547316.073 |
| <b>L<sub>2</sub>Co<sup>III</sup> – R=H</b> |                                |               |              |
| [CoCl <sub>4</sub> ] <sup>2-</sup>         | -1246611.737                   | -1246611.08   | -1246594.894 |
| [CoCl <sub>4</sub> ] <sup>-</sup>          | -1246460.914                   | -1246462.555  |              |

Table S4. Hydration energy of H<sub>2</sub>O molecule and the experimental solvation energies of Cl<sup>-</sup> in water and acetonitrile.<sup>2</sup>

|                  | Solvation energies (kcal/mol) |       |
|------------------|-------------------------------|-------|
|                  | H <sub>2</sub> O              | ACN   |
| Cl <sup>-</sup>  | -72.6                         | -60.5 |
| H <sub>2</sub> O | -2.05                         |       |

In Figure S9 (a) we display the optimized structure of **2d** with R=H. The bond lengths and angles display good agreement with the experimental structure, but the *N*-aryl group is rotated with respect to the equivalent one in the crystal structure. This difference may come from the packing in the crystal. We have carried out some constrained optimization forcing the orientation of *N*-aryl group to be closer to the crystal orientation and it was found to give a negligible change in the gas phase free energy, having a more significant effect on the solvation energy (~ 3 kcal/mol). Since the optimized structure more accurately represents the structure in solution we have used the fully optimized structure in our investigation.

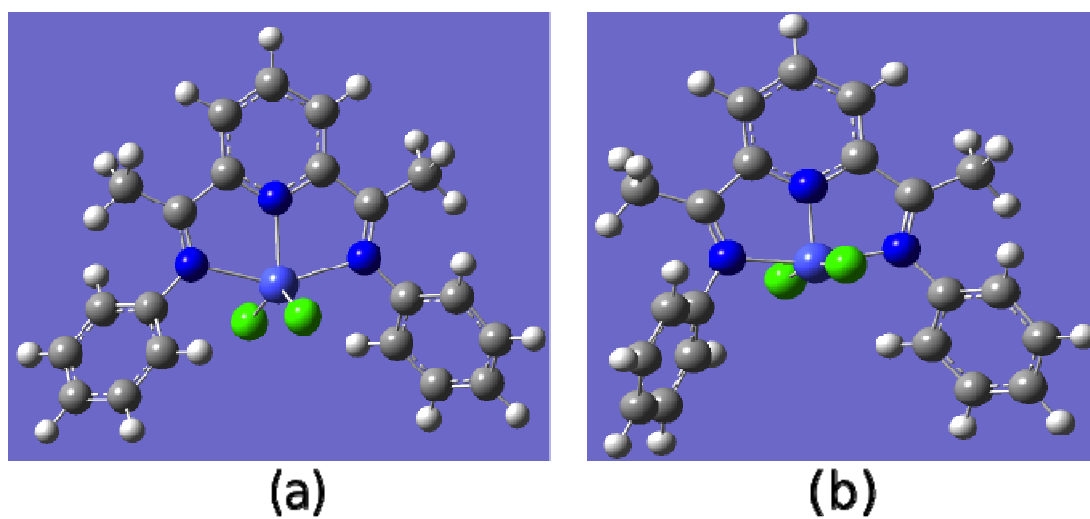

Figure S9. Optimized structures of (a) **2d** and (b) **2d**<sup>+</sup> (R=H).

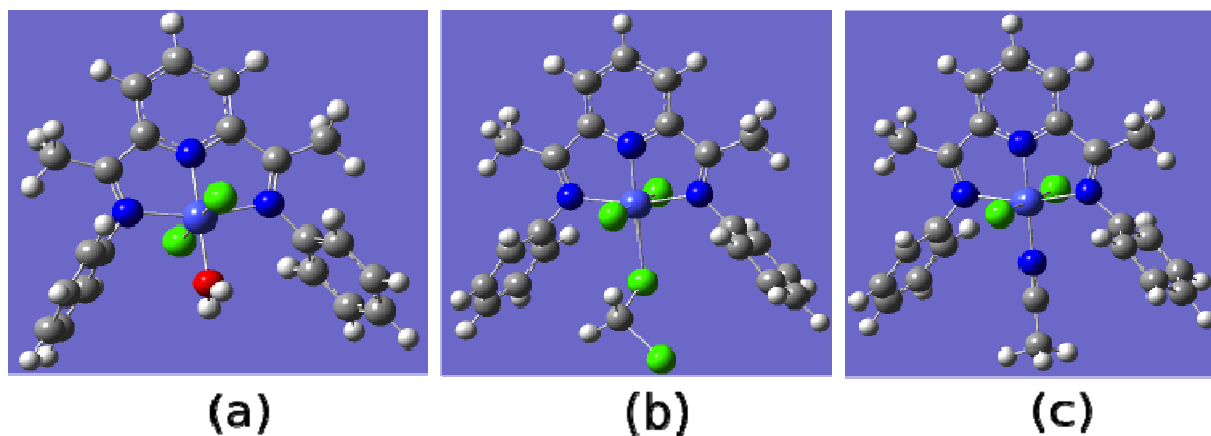

Figure S10. Optimized structures of  $2\mathbf{d}(\text{solv})^+$  for (a)  $\text{H}_2\text{O}$ , (b)  $\text{CH}_2\text{Cl}_2$  and (c)  $\text{CH}_3\text{CN}$ .

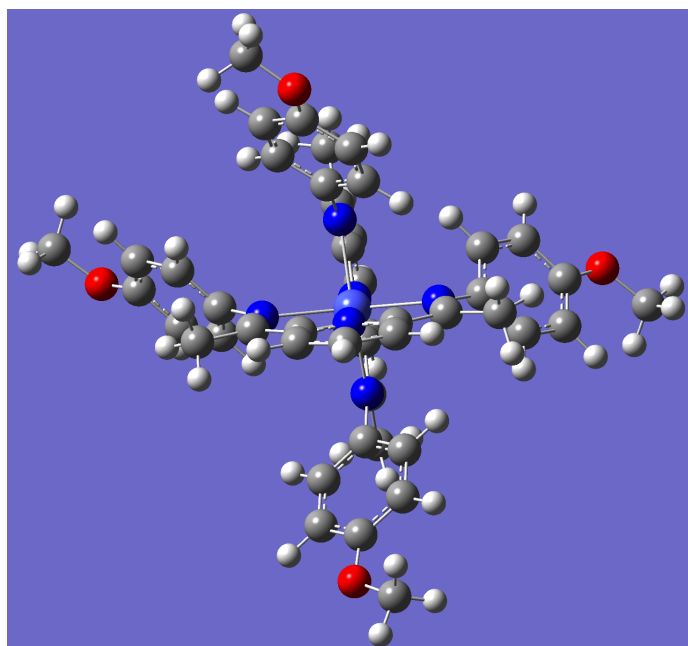

Figure S11. Optimized structure of  $[(\mathbf{1f})_2\text{Co}]^{2+}$  ( $\text{R}=\text{OCH}_3$ ).

References:

1. B. de Bruin, E. Bill, E. Bothe, T. Weyhermuller and K. Wieghardt, *Inorg. Chem.*, 2000, **39**, 2936-2947.
2. (a) C. P. Kelly, C. J. Cramer and D. G. Truhlar, *J. Phys. Chem. B*, 2007, **111**, 408-422;  
(b) J. Sefcik and W. A. Goddard, III, *Geochim. Cosmochim. Acta*, 2001, **65**, 4435-4443.

Appendix: Cartesian coordinates of optimized complexes:

**2d**

|    |               |               |              |
|----|---------------|---------------|--------------|
| Co | 12.8719496076 | 2.1305201702  | 4.2779512996 |
| N  | 14.6072878371 | 1.3329164244  | 3.5100584372 |
| N  | 14.4889599643 | 3.0941267418  | 5.4969818054 |
| N  | 12.1920148482 | 0.7192955565  | 2.6745880344 |
| C  | 15.7823529489 | 1.7433867415  | 4.0341708234 |
| C  | 16.9875171198 | 1.2488108699  | 3.5131771402 |
| C  | 16.9389483434 | 0.3307391602  | 2.4581262547 |
| C  | 15.7082982202 | -0.0787962180 | 1.9381033118 |
| C  | 14.5317784375 | 0.4517891069  | 2.4920671710 |
| C  | 15.6881315362 | 2.7345830140  | 5.1462777322 |
| C  | 16.9696531663 | 3.2044300551  | 5.7888943912 |
| C  | 13.1538112583 | 0.1060155054  | 2.0514331923 |
| C  | 12.9899500523 | -0.8770268366 | 0.9185517257 |
| C  | 14.1814087136 | 4.0911556486  | 6.4685971515 |
| C  | 13.2066969521 | 3.7875877204  | 7.4357744430 |
| C  | 12.8448578072 | 4.7558486517  | 8.3746035475 |
| C  | 13.4192446953 | 6.0333644179  | 8.3372536969 |
| C  | 14.3627132971 | 6.3434189996  | 7.3502849872 |
| C  | 14.7511606118 | 5.3770270187  | 6.4184868990 |
| C  | 10.8040094600 | 0.4584987503  | 2.4671773646 |
| C  | 10.2782883158 | -0.8415320199 | 2.5812916925 |
| C  | 8.9037367086  | -1.0483701760 | 2.4370402237 |

|    |               |               |              |
|----|---------------|---------------|--------------|
| C  | 8.0524003141  | 0.0302282732  | 2.1684096806 |
| C  | 8.5798841269  | 1.3243384189  | 2.0669971961 |
| C  | 9.9485851401  | 1.5484597331  | 2.2315103578 |
| H  | 17.9392239403 | 1.5699940359  | 3.9142797783 |
| H  | 17.8596610624 | -0.0633311825 | 2.0427782351 |
| H  | 15.6658623131 | -0.7901923606 | 1.1244023836 |
| H  | 16.7661105326 | 3.7560914959  | 6.7068739605 |
| H  | 17.6072210554 | 2.3478239723  | 6.0347667509 |
| H  | 17.5394191262 | 3.8603360169  | 5.1185398849 |
| H  | 11.9560825248 | -0.9073737474 | 0.5744211618 |
| H  | 13.6265696988 | -0.5913010622 | 0.0731172286 |
| H  | 13.2764675610 | -1.8920695770 | 1.2215244855 |
| H  | 12.0981595488 | 4.5160158983  | 9.1243491074 |
| H  | 13.1198729697 | 6.7867227397  | 9.0586862092 |
| H  | 14.7874711517 | 7.3405431503  | 7.2958683701 |
| H  | 8.4985408949  | -2.0492025106 | 2.5473780502 |
| H  | 6.9854035678  | -0.1338812080 | 2.0571197810 |
| H  | 7.9227606277  | 2.1667710300  | 1.8768040246 |
| H  | 10.9324365228 | -1.6684957393 | 2.8356403566 |
| H  | 10.3677396314 | 2.5475595710  | 2.1906839822 |
| H  | 15.4452938349 | 5.6314954780  | 5.6250753267 |
| H  | 12.7428838732 | 2.8069803844  | 7.4271967320 |
| Cl | 11.8999958554 | 0.7587538653  | 5.9248025943 |
| Cl | 12.3494079286 | 4.0793823156  | 3.0616194836 |

**2d+**

|    |               |               |              |
|----|---------------|---------------|--------------|
| Co | 13.0710532624 | 1.9263487756  | 4.2553978447 |
| N  | 14.6035127856 | 1.4366664247  | 3.4177105655 |
| N  | 14.2826296396 | 2.9625526186  | 5.3912642666 |
| N  | 12.2253077559 | 0.8241753243  | 2.8773294801 |
| C  | 15.7600526747 | 1.9229686152  | 3.9145669466 |
| C  | 16.9554446032 | 1.5458022392  | 3.2904739052 |
| C  | 16.8923119818 | 0.6824922314  | 2.1862038388 |
| C  | 15.6625888568 | 0.2032630551  | 1.7098609214 |
| C  | 14.4900043154 | 0.6039346268  | 2.3618667473 |
| C  | 15.5457810296 | 2.8210741250  | 5.0700251745 |
| C  | 16.7077936652 | 3.4570280840  | 5.7685557475 |
| C  | 13.0827741597 | 0.2629290754  | 2.0598406960 |
| C  | 12.7452281126 | -0.6556493626 | 0.9263750817 |
| C  | 13.7598901209 | 3.8536921857  | 6.3787945213 |
| C  | 12.8498298199 | 3.3502377943  | 7.3267423907 |
| C  | 12.2873659649 | 4.2213890640  | 8.2623050422 |
| C  | 12.6059220138 | 5.5855772799  | 8.2414218421 |
| C  | 13.4958800461 | 6.0837841321  | 7.2800725733 |
| C  | 14.0779246968 | 5.2242449758  | 6.3465093479 |
| C  | 10.8013104818 | 0.7808973385  | 2.7655708908 |
| C  | 10.0464456992 | 0.4367458658  | 3.9023018184 |
| C  | 8.6520545321  | 0.4490842394  | 3.8248860430 |
| C  | 8.0116648907  | 0.8241745450  | 2.6365724134 |
| C  | 8.7699537017  | 1.1867248582  | 1.5149450024 |

|    |               |               |               |
|----|---------------|---------------|---------------|
| C  | 10.1648282889 | 1.1662310329  | 1.5709744796  |
| H  | 17.9067210805 | 1.9141056951  | 3.6513610547  |
| H  | 17.8084740760 | 0.3817509898  | 1.6922275402  |
| H  | 15.6203935088 | -0.4602686312 | 0.8561722213  |
| H  | 16.4087857509 | 3.8752920732  | 6.7301671489  |
| H  | 17.4958510507 | 2.7160536758  | 5.9414506133  |
| H  | 17.1391929320 | 4.2665843198  | 5.1660808408  |
| H  | 12.8782305997 | -0.1570274298 | -0.0422082116 |
| H  | 13.4027636448 | -1.5316672639 | 0.9415917124  |
| H  | 11.7116751516 | -0.9972850759 | 0.9904899682  |
| H  | 11.5993616003 | 3.8342804897  | 9.0055301277  |
| H  | 12.1570998885 | 6.2585254825  | 8.9636110143  |
| H  | 13.7267530784 | 7.1426649821  | 7.2490115546  |
| H  | 8.0670117987  | 0.1678779820  | 4.6933568118  |
| H  | 6.9286032099  | 0.8429277018  | 2.5866791948  |
| H  | 8.2758406654  | 1.4979101772  | 0.6014338665  |
| H  | 10.5524851963 | 0.1400877974  | 4.8131631593  |
| H  | 10.7525104257 | 1.4934258791  | 0.7210063879  |
| H  | 14.7280750194 | 5.6149985157  | 5.5722521365  |
| H  | 12.6179802257 | 2.2920101942  | 7.3391710086  |
| Cl | 13.1155903401 | 0.1755636886  | 5.7081449688  |
| Cl | 12.6676881328 | 3.7683706358  | 3.0157376671  |

**2d(MeCN)<sup>+</sup>**

|    |               |              |              |
|----|---------------|--------------|--------------|
| Co | 12.9785254256 | 1.9393049883 | 4.2247668839 |
|----|---------------|--------------|--------------|

|   |               |               |              |
|---|---------------|---------------|--------------|
| N | 14.5780443427 | 1.4690582503  | 3.4199831696 |
| N | 14.1936816122 | 2.9530095064  | 5.4103889368 |
| N | 12.2422613806 | 0.7868380690  | 2.7940686982 |
| C | 15.7160439909 | 1.9675049498  | 3.9403830291 |
| C | 16.9390505843 | 1.6306463370  | 3.3501740306 |
| C | 16.9316324160 | 0.7831155086  | 2.2330360239 |
| C | 15.7248868029 | 0.2860339392  | 1.7199400497 |
| C | 14.5301839426 | 0.6540661044  | 2.3485972963 |
| C | 15.4587975217 | 2.8368636614  | 5.1087900745 |
| C | 16.5915142713 | 3.4908776946  | 5.8380070025 |
| C | 13.1441671050 | 0.2714379899  | 2.0026164291 |
| C | 12.8696494289 | -0.6344175352 | 0.8418261085 |
| C | 13.7080616544 | 3.7602992269  | 6.5013887067 |
| C | 13.4389104213 | 3.1520784751  | 7.7364462072 |
| C | 12.9381788741 | 3.9358506222  | 8.7815927917 |
| C | 12.6983513171 | 5.3034399325  | 8.5902057761 |
| C | 12.9568476865 | 5.8932299645  | 7.3459060425 |
| C | 13.4610213185 | 5.1249224493  | 6.2906699681 |
| C | 10.8268440890 | 0.5699742348  | 2.6342603804 |
| C | 10.1845659460 | -0.3769529953 | 3.4456346433 |
| C | 8.8040698538  | -0.5589879893 | 3.3109953482 |
| C | 8.0744815474  | 0.2052006015  | 2.3898138859 |
| C | 8.7269971003  | 1.1592521120  | 1.5981728701 |
| C | 10.1082788284 | 1.3499865489  | 1.7161538337 |
| H | 17.8695623922 | 2.0160957547  | 3.7461289333 |



|    |               |               |               |
|----|---------------|---------------|---------------|
| H  | 17.8677766514 | 0.5102800492  | 1.7608660569  |
| H  | 15.7179895215 | -0.3669232744 | 0.8568595245  |
| H  | 16.2369923041 | 4.0594069030  | 6.6971378122  |
| H  | 17.3042069143 | 2.7353652063  | 6.1905307520  |
| H  | 17.1332541031 | 4.1733653382  | 5.1712794912  |
| H  | 13.1857713054 | -0.1622091022 | -0.0968293002 |
| H  | 13.4312776902 | -1.5703219829 | 0.9482060639  |
| H  | 11.8095111545 | -0.8736274325 | 0.7649595061  |
| H  | 12.7390326329 | 3.4770668318  | 9.7443155734  |
| H  | 12.3134934989 | 5.9058997939  | 9.4060213991  |
| H  | 12.7687116737 | 6.9508228637  | 7.1937950035  |
| H  | 8.3014251987  | -1.3001847096 | 3.9232242113  |
| H  | 7.0047764567  | 0.0564095828  | 2.2882089337  |
| H  | 8.1643756262  | 1.7555854551  | 0.8879860605  |
| H  | 10.7612736240 | -0.9441704998 | 4.1671672225  |
| H  | 10.6220400424 | 2.1038992392  | 1.1306845598  |
| H  | 13.6415293085 | 5.5608362333  | 5.3145226315  |
| H  | 13.6097795121 | 2.0886244730  | 7.8602022647  |
| Cl | 13.1508970513 | 0.0929437484  | 5.6291301432  |
| Cl | 12.8289148022 | 3.7758174138  | 2.8087522316  |
| N  | 11.3154267891 | 2.4387167333  | 5.0519055064  |
| C  | 10.3063777846 | 2.7452921853  | 5.5383169632  |
| C  | 9.0383827746  | 3.1265610194  | 6.1389025734  |
| H  | 8.2158182033  | 2.6086926415  | 5.6354694594  |
| H  | 9.0244211069  | 2.8589462580  | 7.2003449958  |

H 8.8839358624 4.2063828437 6.0453032075

**2d(H<sub>2</sub>O)<sup>+</sup>**

Co 13.0258547115 1.9043853003 4.2209721207

N 14.6177334718 1.4589668152 3.3970023758

N 14.2369901689 2.9284170630 5.4011126741

N 12.2766114999 0.7592625647 2.7929329674

C 15.7557024376 1.9651638614 3.9118867969

C 16.9753979502 1.6430466883 3.3063331408

C 16.9617967568 0.8045049040 2.1817125772

C 15.7543429703 0.3011871654 1.6757491653

C 14.5620589049 0.6522917979 2.3193211060

C 15.5006016652 2.8264250063 5.0898094176

C 16.6316703965 3.4891104405 5.8133197800

C 13.1734107916 0.2624617229 1.9834453381

C 12.8924906423 -0.6290824070 0.8134739068

C 13.7354066774 3.7219496887 6.4941203809

C 13.4817660881 3.1073528102 7.7302442758

C 12.9506261922 3.8746627542 8.7727711760

C 12.6660531477 5.2331013516 8.5793108919

C 12.9130284269 5.8306392782 7.3364099025

C 13.4462997081 5.0788809342 6.2834161330

C 10.8593910237 0.5578747665 2.6438926393

C 10.1961386514 -0.3163089734 3.5181727287

C 8.8133315894 -0.4806211351 3.3936741756

|    |               |               |               |
|----|---------------|---------------|---------------|
| C  | 8.0989196721  | 0.2330576078  | 2.4217529439  |
| C  | 8.7706547573  | 1.1140210435  | 1.5651156166  |
| C  | 10.1557050155 | 1.2821359612  | 1.6695307632  |
| H  | 17.9071624198 | 2.0326428105  | 3.6953068015  |
| H  | 17.8950766058 | 0.5433504704  | 1.6973481365  |
| H  | 15.7449451885 | -0.3433153289 | 0.8063730789  |
| H  | 16.2767695858 | 4.0466444330  | 6.6797393837  |
| H  | 17.3575348138 | 2.7408492153  | 6.1542093515  |
| H  | 17.1586104088 | 4.1837298744  | 5.1470793770  |
| H  | 13.1341061189 | -0.1184299385 | -0.1274367588 |
| H  | 13.5075866244 | -1.5348329014 | 0.8673788640  |
| H  | 11.8435177558 | -0.9226348942 | 0.7818161858  |
| H  | 12.7618048912 | 3.4100656130  | 9.7347113114  |
| H  | 12.2546558374 | 5.8219292077  | 9.3918308516  |
| H  | 12.6917428284 | 6.8814093929  | 7.1832542410  |
| H  | 8.2951783153  | -1.1657084938 | 4.0560670901  |
| H  | 7.0256101412  | 0.1043158677  | 2.3340352300  |
| H  | 8.2196989154  | 1.6728904309  | 0.8165604760  |
| H  | 10.7614104015 | -0.8507405286 | 4.2729300995  |
| H  | 10.6820985923 | 1.9827849161  | 1.0311964955  |
| H  | 13.6204592542 | 5.5228819278  | 5.3098196746  |
| H  | 13.6940227616 | 2.0522778992  | 7.8605889720  |
| Cl | 13.1630682778 | 0.0916025126  | 5.6521272362  |
| Cl | 12.7619337181 | 3.7605072933  | 2.8671192924  |
| O  | 11.3559874900 | 2.3824470239  | 5.0695281714  |

H 11.0502181889 1.9335534539 5.8757553806

H 10.9128777405 3.2166955993 4.8376072117

**2d(DCM)<sup>+</sup>**

Co -0.16753656 -0.11922382 -0.42058853

N -0.64775064 0.14338645 -2.18139493

N 1.65718560 -0.08596470 -1.19214741

N -2.13901402 -0.07095130 -0.16129206

C 0.33942372 0.22845763 -3.09409177

C 0.00286497 0.42607563 -4.43782178

C -1.35259163 0.52832755 -4.78157595

C -2.34856911 0.43531602 -3.79895865

C -1.96053147 0.23716278 -2.46931959

C 1.67982408 0.09259624 -2.48592462

C 2.91101785 0.15292350 -3.33589598

C -2.81078985 0.11251485 -1.26677945

C -4.30216049 0.18972447 -1.37902966

C 2.85278975 -0.21729917 -0.39583521

C 3.28236945 -1.49506808 -0.00913438

C 4.42531895 -1.61082268 0.78744161

C 5.11989469 -0.46700215 1.20140982

C 4.67258143 0.80323775 0.81714619

C 3.53428962 0.93781648 0.01567648

C -2.76727597 -0.17518538 1.13187257

C -2.89610342 -1.43535202 1.73389568

|    |             |             |             |
|----|-------------|-------------|-------------|
| C  | -3.47568580 | -1.52337771 | 3.00340988  |
| C  | -3.90578254 | -0.36747253 | 3.66919712  |
| C  | -3.76008634 | 0.88671522  | 3.06188811  |
| C  | -3.18997401 | 0.99170144  | 1.78800619  |
| H  | 0.77341507  | 0.49880923  | -5.19417524 |
| H  | -1.63332184 | 0.68119092  | -5.81670414 |
| H  | -3.39524552 | 0.51537918  | -4.06200408 |
| H  | 3.80858657  | -0.03645410 | -2.74849224 |
| H  | 2.85577509  | -0.59199926 | -4.13881063 |
| H  | 3.00711272  | 1.14056569  | -3.80421145 |
| H  | -4.61286930 | 1.19030402  | -1.70544922 |
| H  | -4.66517700 | -0.52967849 | -2.12249192 |
| H  | -4.78490867 | -0.02363541 | -0.42603748 |
| H  | 4.76785624  | -2.59478828 | 1.08808812  |
| H  | 6.00181846  | -0.56475923 | 1.82480965  |
| H  | 5.20410097  | 1.69031581  | 1.14335633  |
| H  | -3.58634526 | -2.49468489 | 3.47266700  |
| H  | -4.35194217 | -0.44382064 | 4.65474200  |
| H  | -4.09244582 | 1.78295336  | 3.57451223  |
| H  | -2.53542331 | -2.31720405 | 1.21756213  |
| H  | -3.05422243 | 1.95794211  | 1.31479790  |
| H  | 3.16314125  | 1.91601569  | -0.26898623 |
| H  | 2.72019451  | -2.36901605 | -0.31660549 |
| Cl | -0.25351356 | -2.40085035 | -0.72228555 |
| Cl | -0.08400168 | 2.17299389  | -0.10948603 |

|    |             |             |            |
|----|-------------|-------------|------------|
| Cl | 0.47783798  | -0.62161733 | 1.91125813 |
| C  | 0.49568947  | 0.92777164  | 3.03332723 |
| H  | 0.38736054  | 1.76565945  | 2.35215988 |
| H  | -0.32505953 | 0.77701153  | 3.72516304 |
| Cl | 2.06550429  | 1.05012523  | 3.95594979 |

### **2d(DCM)**

|    |               |              |              |
|----|---------------|--------------|--------------|
| Co | 12.0217756563 | 3.6835803070 | 5.4440532578 |
| N  | 13.7913157689 | 2.9289191041 | 4.7106411831 |
| N  | 13.6377042244 | 4.7463331299 | 6.6401198735 |
| N  | 11.3843979888 | 2.2059268665 | 3.8488610806 |
| C  | 14.9564397700 | 3.3698158469 | 5.2346294547 |
| C  | 16.1744183113 | 2.8709214384 | 4.7464041781 |
| C  | 16.1517300382 | 1.9179271050 | 3.7242722610 |
| C  | 14.9323410215 | 1.4770084308 | 3.2017005204 |
| C  | 13.7418316826 | 2.0099000084 | 3.7201555820 |
| C  | 14.8445383704 | 4.3984090007 | 6.3079983440 |
| C  | 16.1180133888 | 4.9111758247 | 6.9351032709 |
| C  | 12.3795757729 | 1.6121567069 | 3.2617403029 |
| C  | 12.2723467194 | 0.6007675518 | 2.1470406751 |
| C  | 13.3220420833 | 5.7838067137 | 7.5659880291 |
| C  | 12.3677628597 | 5.5157072075 | 8.5622298925 |
| C  | 12.0000612833 | 6.5250370961 | 9.4542376983 |
| C  | 12.5490428460 | 7.8081868359 | 9.3410319097 |
| C  | 13.4757136234 | 8.0819198062 | 8.3277865032 |

|   |               |               |               |
|---|---------------|---------------|---------------|
| C | 13.8701702298 | 7.0747472175  | 7.4431961365  |
| C | 10.0113363318 | 1.8917569950  | 3.6287752415  |
| C | 9.5320277088  | 0.5715940213  | 3.7247964890  |
| C | 8.1659936106  | 0.3184635469  | 3.5751804352  |
| C | 7.2775631286  | 1.3696343635  | 3.3181408452  |
| C | 7.7577096262  | 2.6820838720  | 3.2322789688  |
| C | 9.1168356724  | 2.9519588812  | 3.4034734360  |
| H | 17.1156138760 | 3.2169429771  | 5.1508589058  |
| H | 17.0821911612 | 1.5195241684  | 3.3355236072  |
| H | 14.9096223741 | 0.7373972271  | 2.4129523879  |
| H | 15.9016722587 | 5.5029607359  | 7.8246117567  |
| H | 16.7621229634 | 4.0737705915  | 7.2268553112  |
| H | 16.6874226359 | 5.5411643254  | 6.2401774378  |
| H | 11.2493777631 | 0.5397379292  | 1.7754981539  |
| H | 12.9255669829 | 0.8831153706  | 1.3134717051  |
| H | 12.5719611608 | -0.4012134061 | 2.4788266456  |
| H | 11.2610705477 | 6.3142416325  | 10.2190175255 |
| H | 12.2414018075 | 8.5941904514  | 10.0228368789 |
| H | 13.8816487749 | 9.0820792277  | 8.2157156393  |
| H | 7.7958248651  | -0.6968967608 | 3.6735883850  |
| H | 6.2169704302  | 1.1695123488  | 3.2072729855  |
| H | 7.0709523063  | 3.5033109745  | 3.0614817497  |
| H | 10.2132863021 | -0.2358179876 | 3.9707216220  |
| H | 9.4967619443  | 3.9668206340  | 3.3808921636  |
| H | 14.5514163954 | 7.2991355245  | 6.6296205173  |

|    |               |              |              |
|----|---------------|--------------|--------------|
| H  | 11.9201937982 | 4.5299338722 | 8.6122420358 |
| Cl | 10.9702323699 | 2.5147916462 | 7.1719211247 |
| Cl | 11.2181621082 | 5.6654872261 | 4.5040705022 |
| C  | 8.4025647347  | 5.2450194855 | 6.9580125177 |
| H  | 9.0128010796  | 5.7592608224 | 6.2229021018 |
| H  | 8.8149409274  | 4.2917793537 | 7.2718401599 |
| Cl | 8.2760473971  | 6.3391203936 | 8.4631420529 |
| Cl | 6.7327543137  | 4.9221099592 | 6.1920648863 |

### **2d(MeCN)**

|    |               |               |              |
|----|---------------|---------------|--------------|
| Co | 12.8369154357 | 1.5421626133  | 4.4492293013 |
| N  | 14.4942559334 | 1.8978843098  | 3.2709219638 |
| N  | 14.1128091418 | 2.8464982288  | 5.7125098149 |
| N  | 12.3989471373 | 0.5165734071  | 2.4979258258 |
| C  | 15.4957211350 | 2.6332288718  | 3.7979094231 |
| C  | 16.6762411455 | 2.8285998260  | 3.0687800306 |
| C  | 16.7895721853 | 2.2429634970  | 1.8023002757 |
| C  | 15.7374253760 | 1.4848670841  | 1.2789091186 |
| C  | 14.5740458768 | 1.3237420627  | 2.0527992222 |
| C  | 15.2338658282 | 3.1937427335  | 5.1561986097 |
| C  | 16.2873065597 | 4.0675381696  | 5.7865219853 |
| C  | 13.3604076330 | 0.5736867084  | 1.6260407721 |
| C  | 13.3567567165 | -0.0690032690 | 0.2617801259 |
| C  | 13.6506240886 | 3.3160199767  | 6.9818856318 |
| C  | 13.3425206465 | 2.3616858396  | 7.9632172336 |



|   |               |               |               |
|---|---------------|---------------|---------------|
| C | 12.8412712314 | 2.7883874118  | 9.1961799015  |
| C | 12.6063503431 | 4.1459423006  | 9.4367876419  |
| C | 12.8751415704 | 5.0853513831  | 8.4407555732  |
| C | 13.4088469160 | 4.6786160139  | 7.2153227590  |
| C | 11.1089050903 | -0.0374987382 | 2.2441694283  |
| C | 10.5738561236 | -0.9393241290 | 3.1801654762  |
| C | 9.2880006488  | -1.4460182500 | 2.9891342641  |
| C | 8.5178674424  | -1.0393563933 | 1.8932139987  |
| C | 9.0428147775  | -0.1190051886 | 0.9783521266  |
| C | 10.3368716962 | 0.3798480014  | 1.1447429973  |
| H | 17.4865805086 | 3.4195817009  | 3.4721762764  |
| H | 17.6958946707 | 2.3790241429  | 1.2235851741  |
| H | 15.8182295433 | 1.0356980570  | 0.2978976884  |
| H | 16.0323644176 | 4.3010815600  | 6.8199781378  |
| H | 17.2585846536 | 3.5608384844  | 5.7754291215  |
| H | 16.4001685939 | 5.0123895614  | 5.2421064405  |
| H | 13.3264755621 | 0.6810541806  | -0.5382392828 |
| H | 14.2660095331 | -0.6643124329 | 0.1224587594  |
| H | 12.4952811205 | -0.7251222299 | 0.1419128127  |
| H | 12.6148595010 | 2.0532638030  | 9.9595692631  |
| H | 12.1944062383 | 4.4654037022  | 10.3877240363 |
| H | 12.6454218695 | 6.1305516555  | 8.5981495807  |
| H | 8.8810249542  | -2.1457891494 | 3.7110059742  |
| H | 7.5115804603  | -1.4223268202 | 1.7623927826  |
| H | 8.4412375457  | 0.2223751048  | 0.1423528440  |

|    |               |               |              |
|----|---------------|---------------|--------------|
| H  | 11.1694735595 | -1.2174665323 | 4.0422085675 |
| H  | 10.7256537058 | 1.1295761193  | 0.4641734342 |
| H  | 13.5730692813 | 5.4000675874  | 6.4249439200 |
| H  | 13.4850019990 | 1.3106237927  | 7.7424219999 |
| Cl | 13.1900838314 | -0.4883220207 | 5.6087851556 |
| Cl | 11.0264374358 | 2.9932930758  | 4.1095127993 |
| N  | 10.2149587636 | 6.7669446176  | 6.4437355214 |
| C  | 9.4343182547  | 6.1063342168  | 5.9415316786 |
| C  | 8.4621888743  | 5.2778434271  | 5.2988704410 |
| H  | 7.6570490790  | 5.0712611691  | 5.9653518396 |
| H  | 8.0597097200  | 5.7707040187  | 4.4061498020 |
| H  | 8.9258069507  | 4.3667315477  | 4.9960828057 |

**2f** – R=OCH<sub>3</sub>

|    |               |              |              |
|----|---------------|--------------|--------------|
| Co | 12.8473651152 | 2.1177870132 | 4.2238990837 |
| N  | 14.6469294629 | 1.5284739400 | 3.3822679856 |
| N  | 14.3889872812 | 3.1501497876 | 5.3990166567 |
| N  | 12.2892975041 | 0.8074791122 | 2.5483599964 |
| C  | 15.7988307658 | 1.9673915633 | 3.9332563273 |
| C  | 17.0332079440 | 1.5433351721 | 3.4175943286 |
| C  | 17.0407251586 | 0.6560500651 | 2.3367442180 |
| C  | 15.8347973851 | 0.2025923943 | 1.7935262537 |
| C  | 14.6290112726 | 0.6593566845 | 2.3487680233 |
| C  | 15.6246370243 | 2.8906906293 | 5.0797882166 |
| C  | 16.8470968364 | 3.3852246214 | 5.8090530559 |

|   |               |               |               |
|---|---------------|---------------|---------------|
| C | 13.2756445736 | 0.2626080888  | 1.8940354403  |
| C | 13.1479327062 | -0.7624663282 | 0.7966330526  |
| C | 13.9877983764 | 4.0410028588  | 6.4378501841  |
| C | 13.0246612307 | 3.5931168187  | 7.3653110764  |
| C | 12.5759405849 | 4.4485447777  | 8.3621241499  |
| C | 13.0452075211 | 5.7715276033  | 8.4265350958  |
| C | 13.9798835314 | 6.2344473383  | 7.4903980926  |
| C | 14.4538453532 | 5.3630230671  | 6.5039053621  |
| C | 10.9084340914 | 0.6118370413  | 2.2584838772  |
| C | 10.0385739596 | 0.3593500344  | 3.3321051551  |
| C | 8.6691410144  | 0.2145402835  | 3.1090563811  |
| C | 8.1540154983  | 0.3601372854  | 1.8124553388  |
| C | 9.0151653463  | 0.6377091217  | 0.7383638706  |
| C | 10.3832325536 | 0.7569936084  | 0.9575242489  |
| H | 17.9621092508 | 1.8965815421  | 3.8455191257  |
| H | 17.9828991995 | 0.3174880387  | 1.9206149340  |
| H | 15.8334910358 | -0.4858618608 | 0.9590541115  |
| H | 16.5732513836 | 3.8458556752  | 6.7587223099  |
| H | 17.5279947102 | 2.5513288355  | 6.0130939601  |
| H | 17.3997001444 | 4.1273780039  | 5.2187191547  |
| H | 13.3942868811 | -0.3407106098 | -0.1863153691 |
| H | 13.8324095072 | -1.5981901349 | 0.9789224872  |
| H | 12.1320707634 | -1.1561867287 | 0.7488168682  |
| H | 11.8434985862 | 4.1235196423  | 9.0908706051  |
| H | 14.3320145615 | 7.2582352933  | 7.5071429114  |

|    |               |               |               |
|----|---------------|---------------|---------------|
| H  | 8.0195429120  | 0.0119429630  | 3.9509216782  |
| H  | 8.5868453398  | 0.7725138654  | -0.2475275011 |
| H  | 10.4503284450 | 0.2666832077  | 4.3314847521  |
| H  | 11.0375175755 | 1.0162820274  | 0.1323016474  |
| H  | 15.1468902366 | 5.7322239244  | 5.7552803139  |
| H  | 12.6539435915 | 2.5764979188  | 7.2887911175  |
| Cl | 12.6860213065 | 0.2940319378  | 5.8386834311  |
| Cl | 11.1874350578 | 3.7148900492  | 4.1566387386  |
| O  | 12.5155305936 | 6.5430973057  | 9.4510655441  |
| O  | 6.8100373411  | 0.2573211222  | 1.4868608293  |
| C  | 5.8411876621  | 0.0713741502  | 2.5552850491  |
| H  | 4.8710988936  | 0.0618879950  | 2.0598456972  |
| H  | 6.0012627429  | -0.8803065917 | 3.0748394615  |
| H  | 5.8845785211  | 0.8968465955  | 3.2744586684  |
| C  | 12.8867262656 | 7.9435165490  | 9.5427612918  |
| H  | 12.3285190652 | 8.3304017610  | 10.3944868358 |
| H  | 13.9620954966 | 8.0595654600  | 9.7225177429  |
| H  | 12.6028813666 | 8.4884604476  | 8.6350355399  |

**2b** – R=CN

|    |               |              |              |
|----|---------------|--------------|--------------|
| Co | 12.9410716189 | 2.0879411465 | 4.2244952500 |
| N  | 14.6958042197 | 1.4954878619 | 3.2924808878 |
| N  | 14.5358005763 | 3.0997278846 | 5.3194819085 |
| N  | 12.3052451305 | 0.7857090839 | 2.5931087241 |
| C  | 15.8750134074 | 1.9168375051 | 3.7953263179 |

|   |               |               |              |
|---|---------------|---------------|--------------|
| C | 17.0807740217 | 1.4717872669  | 3.2347397146 |
| C | 17.0322919695 | 0.5803767633  | 2.1576279319 |
| C | 15.7980186780 | 0.1423113448  | 1.6658105685 |
| C | 14.6252423311 | 0.6215300831  | 2.2666793680 |
| C | 15.7550355130 | 2.8362424289  | 4.9548559880 |
| C | 17.0038825846 | 3.3241135081  | 5.6395948119 |
| C | 13.2441113873 | 0.2335796629  | 1.8841047384 |
| C | 13.0403752731 | -0.7810096044 | 0.7907534824 |
| C | 14.1733867508 | 3.9733630206  | 6.3875650515 |
| C | 13.3548685936 | 3.4649925371  | 7.4101429502 |
| C | 12.9369834497 | 4.3078653175  | 8.4356763421 |
| C | 13.3091516218 | 5.6674759353  | 8.4366325286 |
| C | 14.1076424599 | 6.1741627919  | 7.3932080656 |
| C | 14.5420854125 | 5.3292165596  | 6.3745697525 |
| C | 10.9066382648 | 0.5852669308  | 2.3954023412 |
| C | 10.1427437263 | 0.1309485314  | 3.4835906526 |
| C | 8.7665596798  | -0.0181034798 | 3.3397957760 |
| C | 8.1381975762  | 0.3083940119  | 2.1209731695 |
| C | 8.9085117318  | 0.7879031495  | 1.0440821205 |
| C | 10.2884763786 | 0.9215977663  | 1.1791052344 |
| H | 18.0310854627 | 1.8077014983  | 3.6285829036 |
| H | 17.9517125563 | 0.2237941781  | 1.7080478772 |
| H | 15.7511660352 | -0.5555451344 | 0.8400684389 |
| H | 16.7660454228 | 3.8596419008  | 6.5587554011 |
| H | 17.6510197576 | 2.4765340029  | 5.8930234858 |

|    |               |               |               |
|----|---------------|---------------|---------------|
| H  | 17.5775935661 | 3.9975930526  | 4.9906568216  |
| H  | 13.3448673801 | -0.3822798932 | -0.1850458901 |
| H  | 13.6443094134 | -1.6743599659 | 0.9871774544  |
| H  | 11.9951586666 | -1.0829183422 | 0.7227889318  |
| H  | 12.3083388255 | 3.9233332067  | 9.2303361198  |
| H  | 14.3740752460 | 7.2247360045  | 7.3827746429  |
| H  | 8.1701228964  | -0.3710691936 | 4.1729748949  |
| H  | 8.4213329765  | 1.0602471134  | 0.1149415683  |
| H  | 10.6394501570 | -0.0877545966 | 4.4229590053  |
| H  | 10.8777782033 | 1.3251378957  | 0.3632010234  |
| H  | 15.1264748219 | 5.7256586957  | 5.5517040439  |
| H  | 13.0548057883 | 2.4229125458  | 7.3778185873  |
| Cl | 12.9177786148 | 0.2390457376  | 5.8165383771  |
| Cl | 11.2665482038 | 3.6509716083  | 4.2699598482  |
| C  | 12.8741594915 | 6.5327062173  | 9.4878640081  |
| N  | 12.5258947699 | 7.2427268201  | 10.3552739882 |
| C  | 6.7238227721  | 0.1605802697  | 1.9774649395  |
| N  | 5.5637209667  | 0.0307699025  | 1.8545595904  |

**L<sub>2</sub>Co<sup>II</sup> – R=H**

|    |               |              |              |
|----|---------------|--------------|--------------|
| Co | 11.8590481763 | 2.7228254930 | 5.7278446279 |
| N  | 9.9607534386  | 2.6847382437 | 5.3619043356 |
| N  | 11.4552641948 | 4.8361628981 | 5.0216954676 |
| N  | 11.3203034882 | 0.6237724010 | 6.2811419198 |
| C  | 9.3327349978  | 3.8091318006 | 4.9273328079 |

|   |               |               |              |
|---|---------------|---------------|--------------|
| C | 7.9573021382  | 3.7936736342  | 4.6524988208 |
| C | 7.2406849965  | 2.6053723776  | 4.8108531449 |
| C | 7.9032167791  | 1.4566953905  | 5.2506688119 |
| C | 9.2746464041  | 1.5227332222  | 5.5316994537 |
| C | 10.1883159915 | 5.0126805575  | 4.7685960111 |
| C | 9.5524957257  | 6.2905895935  | 4.2854386158 |
| C | 10.0671180576 | 0.3700462028  | 6.0298951087 |
| C | 9.3779445631  | -0.9513319155 | 6.2447638790 |
| C | 12.4202408217 | 5.8941909410  | 4.9801389434 |
| C | 13.5638726096 | 5.7293906770  | 4.1794045868 |
| C | 14.5335418166 | 6.7349997542  | 4.1329288870 |
| C | 14.3875688335 | 7.8954214424  | 4.9052432007 |
| C | 13.2588901611 | 8.0509364448  | 5.7192717189 |
| C | 12.2722286470 | 7.0597962370  | 5.7553830352 |
| C | 12.2514437889 | -0.3702266153 | 6.7295951350 |
| C | 12.5691072985 | -1.4879303724 | 5.9364221960 |
| C | 13.5217717688 | -2.4107894746 | 6.3834917642 |
| C | 14.1502287732 | -2.2342119080 | 7.6224056560 |
| C | 13.8277182869 | -1.1231563996 | 8.4136012568 |
| C | 12.8931078025 | -0.1846601214 | 7.9664180802 |
| H | 7.4557747639  | 4.6915201376  | 4.3183719971 |
| H | 6.1793077311  | 2.5747298890  | 4.5947478796 |
| H | 7.3627587150  | 0.5282744842  | 5.3753287130 |
| H | 10.3026430036 | 7.0413609036  | 4.0391813299 |
| H | 8.9512827261  | 6.1035178998  | 3.3886742266 |

|   |               |               |              |
|---|---------------|---------------|--------------|
| H | 8.8837077179  | 6.7170012715  | 5.0433882793 |
| H | 10.0329764873 | -1.6656396884 | 6.7426654153 |
| H | 8.4811858326  | -0.8229934378 | 6.8615111112 |
| H | 9.0582738488  | -1.3920341128 | 5.2922517253 |
| H | 15.3996929468 | 6.6179178501  | 3.4904001622 |
| H | 15.1430430701 | 8.6721624917  | 4.8689383122 |
| H | 13.1399279197 | 8.9476599649  | 6.3177318764 |
| H | 13.7628204878 | -3.2722468545 | 5.7698311293 |
| H | 14.8774452147 | -2.9584478849 | 7.9717440564 |
| H | 14.2984366273 | -0.9931079433 | 9.3824258543 |
| H | 12.0744825437 | -1.6329046184 | 4.9815193623 |
| H | 12.6298711941 | 0.6686563711  | 8.5812969409 |
| H | 11.3970055911 | 7.1849946540  | 6.3837474758 |
| H | 13.6655210691 | 4.8358321041  | 3.5742279771 |
| N | 13.7221765037 | 2.7251358251  | 6.0803738886 |
| C | 14.1698888823 | 3.1738664317  | 7.2782733000 |
| C | 15.5416808823 | 3.1816668752  | 7.5631315253 |
| C | 16.4363760795 | 2.6998067400  | 6.6012965500 |
| C | 15.9528227536 | 2.2284388222  | 5.3754428443 |
| C | 14.5732468925 | 2.2598533625  | 5.1332986669 |
| C | 13.0922939680 | 3.6120251585  | 8.1902643921 |
| H | 15.9044525357 | 3.5519628230  | 8.5128757689 |
| H | 17.5005929425 | 2.6913158306  | 6.8051390036 |
| H | 16.6347751414 | 1.8481012037  | 4.6263402863 |
| C | 13.9017671571 | 1.8372247011  | 3.8856021535 |



|   |               |               |               |
|---|---------------|---------------|---------------|
| C | 14.7275103175 | 1.3168991574  | 2.7433156859  |
| H | 14.1367891600 | 1.2038634267  | 1.8351799407  |
| H | 15.5586299417 | 1.9992093000  | 2.5310212920  |
| H | 15.1641392908 | 0.3400740619  | 2.9876330046  |
| C | 13.4465144572 | 4.1358344860  | 9.5535336042  |
| H | 12.5658814658 | 4.2460729957  | 10.1852531911 |
| H | 14.1467879968 | 3.4571392022  | 10.0534498948 |
| H | 13.9373968442 | 5.1149265698  | 9.4835699869  |
| N | 12.6034463386 | 2.0083810646  | 3.8836238710  |
| N | 11.8823857078 | 3.4600078958  | 7.7120768112  |
| C | 10.2000897735 | 0.9407229497  | 0.5555267813  |
| C | 10.3381588940 | 2.2843615160  | 0.9287106535  |
| C | 11.1236068165 | 2.6352409750  | 2.0314238306  |
| C | 11.7933611221 | 1.6342438228  | 2.7527992107  |
| C | 11.6622771427 | 0.2858915196  | 2.3794600302  |
| C | 10.8607240770 | -0.0558474933 | 1.2844430722  |
| H | 9.5921685532  | 0.6740865475  | -0.3016133702 |
| H | 9.8444977910  | 3.0599863169  | 0.3531087393  |
| H | 11.2502653532 | 3.6745073836  | 2.3121339859  |
| H | 12.1888147435 | -0.4826761922 | 2.9354816874  |
| H | 10.7650279460 | -1.0963786027 | 0.9935294158  |
| C | 8.4137469417  | 4.6557816287  | 9.8387967773  |
| C | 8.6236571243  | 3.3057708964  | 9.5267633671  |
| C | 9.7654894397  | 2.9120775313  | 8.8218172791  |
| C | 10.7158787113 | 3.8744720037  | 8.4455855802  |

|   |               |              |               |
|---|---------------|--------------|---------------|
| C | 10.5122337158 | 5.2289731480 | 8.7614768263  |
| C | 9.3582010175  | 5.6146933071 | 9.4521800632  |
| H | 7.5270354119  | 4.9561185860 | 10.3855388779 |
| H | 7.9029087475  | 2.5587923539 | 9.8415583352  |
| H | 9.9411327302  | 1.8673825261 | 8.5931291278  |
| H | 11.2491573512 | 5.9686220943 | 8.4670186795  |
| H | 9.2042114279  | 6.6598311910 | 9.6981132832  |

**L<sub>2</sub>Co<sup>II</sup> – R=OCH<sub>3</sub>**

|   |                |               |               |
|---|----------------|---------------|---------------|
| C | -6.2381812904  | -9.4116348152 | 10.7474483873 |
| C | -8.0730199580  | -8.4309733878 | 12.0534004365 |
| C | -9.1698980098  | -7.5454745937 | 12.0512649202 |
| C | -9.9087148008  | -7.3428482657 | 13.2087551726 |
| C | -9.5506508795  | -7.9978233801 | 14.4046583673 |
| C | -8.4539211524  | -8.8762115684 | 14.4048016450 |
| C | -7.7199486791  | -9.1022540652 | 13.2360690189 |
| C | -9.8355108450  | -7.3594166718 | 16.7058110747 |
| C | -8.4195895179  | -6.8948010069 | 16.9104174325 |
| C | -10.7856614107 | -7.3108913129 | 17.8353914684 |
| C | -10.4898336712 | -6.8547764542 | 19.1269968813 |
| C | -11.4956349287 | -6.8691115791 | 20.0988979483 |
| C | -12.7694206807 | -7.3446061721 | 19.7733062633 |
| C | -13.0146471912 | -7.8002418688 | 18.4698945023 |
| C | -14.3025448596 | -8.3299430554 | 17.9798176709 |
| C | -15.4546512667 | -8.4486508163 | 18.9401327117 |

|   |                |                |               |
|---|----------------|----------------|---------------|
| C | -15.4985608957 | -9.1356156869  | 16.0580613729 |
| C | -16.6630463404 | -8.3485094336  | 16.0321279835 |
| C | -17.8068346451 | -8.7852660759  | 15.3561507497 |
| C | -17.7976440362 | -10.0315190396 | 14.7070832417 |
| C | -16.6312869052 | -10.8222955877 | 14.7282442284 |
| C | -15.4936560426 | -10.3731975078 | 15.3838447530 |
| C | -20.1439796567 | -9.8763324821  | 13.9953356422 |
| C | -9.3116281988  | -12.9965313657 | 21.4138096574 |
| C | -10.7318788885 | -12.5535224195 | 19.4597832657 |
| C | -9.9304178335  | -11.4980710439 | 18.9924849979 |
| C | -10.2818039182 | -10.8293844957 | 17.8152901057 |
| C | -11.4083109957 | -11.2194023966 | 17.0766873952 |
| C | -12.2054674111 | -12.2836323912 | 17.5528980385 |
| C | -11.8762802637 | -12.9357251356 | 18.7341831549 |
| C | -11.8926760533 | -11.0959329096 | 14.7287165110 |
| C | -11.5091208809 | -12.5203031945 | 14.4257700048 |
| C | -12.4363860008 | -10.2531216148 | 13.6377214259 |
| C | -12.6648744147 | -10.7144753370 | 12.3338446830 |
| C | -13.2413370017 | -9.8530073848  | 11.3967107092 |
| C | -13.5767958226 | -8.5506021109  | 11.7730835169 |
| C | -13.3163554251 | -8.1259671223  | 13.0845545054 |
| C | -13.6227471663 | -6.7681859460  | 13.5912766611 |
| C | -14.2679146321 | -5.7735080643  | 12.6621522362 |
| C | -13.5474368186 | -5.3247522223  | 15.5206372258 |
| C | -12.4969459974 | -4.6493469418  | 16.1760329900 |

|    |                |                |               |
|----|----------------|----------------|---------------|
| C  | -12.7475241094 | -3.4910250137  | 16.8980452778 |
| C  | -14.0620428044 | -2.9951834799  | 17.0117983332 |
| C  | -15.1193410342 | -3.6696180332  | 16.3786949241 |
| C  | -14.8560351681 | -4.8217331488  | 15.6309146847 |
| C  | -15.5050013406 | -1.2236214276  | 17.9127554654 |
| Co | -12.4030557557 | -8.3718283889  | 15.7761703959 |
| H  | -9.4064396768  | -7.0275125856  | 11.1297226577 |
| H  | -10.7397473522 | -6.6479663913  | 13.2111943480 |
| H  | -8.1831593976  | -9.4064357942  | 15.3120731096 |
| H  | -6.8848581999  | -9.7908531631  | 13.2587629496 |
| H  | -9.4986315443  | -6.4953684076  | 19.3694721867 |
| H  | -11.2881619646 | -6.5134763529  | 21.1012116674 |
| H  | -13.5551745997 | -7.3589469446  | 20.5164949864 |
| H  | -16.6726855984 | -7.3825979419  | 16.5261237423 |
| H  | -18.6900816473 | -8.1592104379  | 15.3469153743 |
| H  | -15.8742201440 | -7.4665051197  | 19.1917873239 |
| H  | -15.1191599650 | -8.9097045533  | 19.8755489703 |
| H  | -16.2566273477 | -9.0601234629  | 18.5273329334 |
| H  | -5.9204597812  | -9.3195039341  | 9.7110499785  |
| H  | -6.4803158557  | -10.4556237340 | 10.9722391300 |
| H  | -5.4482030856  | -9.0512528069  | 11.4139187193 |
| H  | -16.6581971333 | -11.7850232214 | 14.2321668890 |
| H  | -14.6062023057 | -10.9917614737 | 15.4179472698 |
| H  | -9.0380547545  | -11.1997478984 | 19.5284498623 |
| H  | -9.6551473325  | -10.0252165677 | 17.4491285822 |

|   |                |                |               |
|---|----------------|----------------|---------------|
| H | -13.0933345263 | -12.5821150441 | 17.0052163634 |
| H | -12.4806421762 | -13.7486302030 | 19.1179903204 |
| H | -12.4081108852 | -11.7284893715 | 12.0588327844 |
| H | -13.4312672477 | -10.1947736193 | 10.3861176913 |
| H | -14.0346019702 | -7.8780522841  | 11.0607333906 |
| H | -11.4841542620 | -5.0208590188  | 16.0758455883 |
| H | -11.9499890487 | -2.9392342812  | 17.3808535504 |
| H | -16.1368241141 | -3.3076882399  | 16.4565309060 |
| H | -15.6776827320 | -5.3450444857  | 15.1532180517 |
| H | -20.7996316587 | -10.5287398961 | 13.4225108949 |
| H | -20.0529405890 | -8.9066316088  | 13.4952031640 |
| H | -20.5369815410 | -9.7480103159  | 15.0088486224 |
| H | -9.3594600259  | -13.7117135305 | 22.2323963817 |
| H | -9.3382782809  | -11.9755014142 | 21.8095121615 |
| H | -8.3972625827  | -13.1560226370 | 20.8328778735 |
| H | -10.8593724207 | -12.5577254303 | 13.5441510523 |
| H | -12.3870933855 | -13.1422088401 | 14.2108514236 |
| H | -10.9769903450 | -12.9722413667 | 15.2624127321 |
| H | -15.3128689449 | -6.0344026278  | 12.4525510594 |
| H | -13.7404529138 | -5.7479707713  | 11.7022199276 |
| H | -14.2506517488 | -4.7689062661  | 13.0845778572 |
| H | -15.3226493206 | -0.3465741860  | 18.5301316505 |
| H | -16.2093189694 | -1.8943941725  | 18.4161431338 |
| H | -15.8988397636 | -0.9189218753  | 16.9379236062 |
| H | -7.8442588520  | -7.6034987202  | 17.5197067473 |

|   |                |                |               |
|---|----------------|----------------|---------------|
| H | -8.4075606455  | -5.9333083981  | 17.4347824451 |
| H | -7.9003004847  | -6.7738852814  | 15.9597421891 |
| N | -10.3458257977 | -7.7920003624  | 15.5784861943 |
| N | -12.0293696718 | -7.7678244193  | 17.5375691967 |
| N | -14.3065736213 | -8.6958612175  | 16.7205221292 |
| N | -11.7760290208 | -10.5070712361 | 15.8888136164 |
| N | -12.7598345317 | -8.9791113753  | 13.9852519301 |
| N | -13.2566937702 | -6.5371565406  | 14.8245052566 |
| O | -7.4284028079  | -8.5673381900  | 10.8500751398 |
| O | -18.8570786412 | -10.5710072449 | 14.0229218347 |
| O | -10.4965091539 | -13.2732480300 | 20.6055842902 |
| O | -14.1952520990 | -1.8579399247  | 17.7683307940 |

**L<sub>2</sub>Co<sup>II</sup> – R=CN**

|    |               |              |              |
|----|---------------|--------------|--------------|
| Co | 11.6641815479 | 2.7099390498 | 5.6470791725 |
| N  | 9.7926005127  | 2.7065768716 | 5.2894902246 |
| N  | 11.3728831843 | 4.7018794347 | 5.0026358459 |
| N  | 11.1591143834 | 0.7372265575 | 6.1740092763 |
| C  | 9.1964713539  | 3.8426539162 | 4.8509092784 |
| C  | 7.8227863287  | 3.8626082476 | 4.5731195133 |
| C  | 7.0793125643  | 2.6885279393 | 4.7401045680 |
| C  | 7.7132114534  | 1.5228591695 | 5.1868154493 |
| C  | 9.0858823553  | 1.5616923588 | 5.4633774451 |
| C  | 10.1251500939 | 4.9835675347 | 4.7153433784 |
| C  | 9.6021273372  | 6.3128192487 | 4.2506695462 |

|   |               |               |              |
|---|---------------|---------------|--------------|
| C | 9.9008317837  | 0.4375183841  | 5.9666512694 |
| C | 9.2589764043  | -0.8946601261 | 6.2275194884 |
| C | 12.3940356904 | 5.7112641694  | 4.9961912499 |
| C | 13.4664194170 | 5.6046824580  | 4.0971294087 |
| C | 14.4745632619 | 6.5676429820  | 4.1015655538 |
| C | 14.4318106823 | 7.6367265944  | 5.0197145131 |
| C | 13.3542848176 | 7.7371755178  | 5.9213853232 |
| C | 12.3387339264 | 6.7817976069  | 5.9055060865 |
| C | 12.0942852266 | -0.2498298717 | 6.6383007979 |
| C | 12.5024908416 | -1.2913796053 | 5.7890967756 |
| C | 13.4268970138 | -2.2332212637 | 6.2396189851 |
| C | 13.9417655289 | -2.1444270250 | 7.5472619521 |
| C | 13.5184210649 | -1.1033421028 | 8.3977755790 |
| C | 12.6055406499 | -0.1539966443 | 7.9417114661 |
| H | 7.3421573730  | 4.7710216533  | 4.2343030172 |
| H | 6.0172090895  | 2.6820129844  | 4.5254812812 |
| H | 7.1504744698  | 0.6076681460  | 5.3176090578 |
| H | 10.4072146535 | 7.0096348626  | 4.0202782510 |
| H | 8.9882496912  | 6.1888730859  | 3.3513913472 |
| H | 8.9640769341  | 6.7743670329  | 5.0153794213 |
| H | 9.9366082634  | -1.5815564936 | 6.7329851041 |
| H | 8.3643494084  | -0.7754539958 | 6.8498069445 |
| H | 8.9377463875  | -1.3647069228 | 5.2889969038 |
| H | 15.2930845557 | 6.5057377139  | 3.3937628130 |
| C | 15.4778559075 | 8.6103355673  | 5.0379358840 |

|   |               |               |               |
|---|---------------|---------------|---------------|
| H | 13.3148993681 | 8.5657074575  | 6.6192385981  |
| H | 13.7434051012 | -3.0437597229 | 5.5930592195  |
| C | 14.8900626765 | -3.1051800345 | 8.0113555174  |
| H | 13.8992127044 | -1.0545151737 | 9.4115791943  |
| H | 12.0897179166 | -1.3678754525 | 4.7893661760  |
| H | 12.2637379803 | 0.6367713947  | 8.5990412620  |
| H | 11.5068123476 | 6.8624617697  | 6.5962114280  |
| H | 13.4901772871 | 4.7919335541  | 3.3813472173  |
| N | 13.5850031502 | 2.6863437827  | 5.9911901927  |
| C | 14.0622220027 | 3.0754824423  | 7.2044072865  |
| C | 15.4393853244 | 3.0630448702  | 7.4713293653  |
| C | 16.3260073658 | 2.6336396622  | 6.4815451658  |
| C | 15.8224292932 | 2.2290999503  | 5.2429725677  |
| C | 14.4390871998 | 2.2690149640  | 5.0168501830  |
| C | 13.0486874289 | 3.5081108220  | 8.1982941621  |
| H | 15.8133542694 | 3.3819790563  | 8.4345792352  |
| H | 17.3924072472 | 2.6131219718  | 6.6728583539  |
| H | 16.4945720694 | 1.8878118871  | 4.4674786464  |
| C | 13.8152081311 | 1.8585556601  | 3.7341282108  |
| C | 14.7008681261 | 1.3917372047  | 2.6088295252  |
| H | 14.1398274989 | 1.2630482306  | 1.6837013359  |
| H | 15.5005449970 | 2.1173789413  | 2.4221382186  |
| H | 15.1815956567 | 0.4350328163  | 2.8485289623  |
| C | 13.5118056198 | 3.9201057511  | 9.5716691038  |
| H | 12.6742882899 | 4.0478501387  | 10.2567281161 |



|   |               |               |               |
|---|---------------|---------------|---------------|
| H | 14.1815662767 | 3.1622655410  | 9.9932567429  |
| H | 14.0694056614 | 4.8645360399  | 9.5418166433  |
| N | 12.5173947871 | 1.9713936538  | 3.6837906793  |
| N | 11.8098079751 | 3.4548292088  | 7.7939856114  |
| C | 10.0849683667 | 0.7360906597  | 0.4420055277  |
| C | 10.1067421798 | 2.0857332699  | 0.8507636934  |
| C | 10.9162783375 | 2.4842632058  | 1.9122698700  |
| C | 11.7380064661 | 1.5473696303  | 2.5625536467  |
| C | 11.7337048093 | 0.2034649755  | 2.1444332938  |
| C | 10.9078249533 | -0.2015148388 | 1.0960294907  |
| C | 9.2221944471  | 0.3221570533  | -0.6195571657 |
| H | 9.4911723406  | 2.8100136492  | 0.3293888923  |
| H | 10.9417129321 | 3.5229991996  | 2.2200595395  |
| H | 12.3711320541 | -0.5215608215 | 2.6386423213  |
| H | 10.9007370935 | -1.2368946945 | 0.7746652958  |
| C | 8.4838548204  | 4.7869289580  | 10.0583639802 |
| C | 8.5499738884  | 3.4591004149  | 9.5885137817  |
| C | 9.6483865246  | 3.0317000427  | 8.8458101640  |
| C | 10.7117527395 | 3.9132979023  | 8.5849868299  |
| C | 10.6520409503 | 5.2375602408  | 9.0595832373  |
| C | 9.5439648929  | 5.6732859888  | 9.7856794975  |
| C | 7.3448490671  | 5.2282385182  | 10.8001213542 |
| H | 7.7415715826  | 2.7734867499  | 9.8154376004  |
| H | 9.7049267654  | 2.0078957786  | 8.4962030150  |
| H | 11.4670612421 | 5.9237148959  | 8.8578885334  |

|   |               |               |               |
|---|---------------|---------------|---------------|
| H | 9.4974705393  | 6.6923637417  | 10.1521574702 |
| N | 16.3419899379 | 9.4031168944  | 5.0587779371  |
| N | 15.6760707219 | -3.8870334611 | 8.3920009073  |
| N | 6.4026191290  | 5.5861801587  | 11.4001122995 |
| N | 8.4984711883  | -0.0166808616 | -1.4783322097 |

**L<sub>2</sub>Co<sup>III</sup> – R=H**

|    |               |               |              |
|----|---------------|---------------|--------------|
| Co | 11.8154045215 | 2.7117404185  | 5.7049131378 |
| N  | 9.9730379229  | 2.6695953987  | 5.3537679544 |
| N  | 11.5774160682 | 4.6189591083  | 5.0472674145 |
| N  | 11.4397958877 | 0.8083169732  | 6.2512719133 |
| C  | 9.3769174301  | 3.7944515621  | 4.9066545750 |
| C  | 8.0005920787  | 3.7888240251  | 4.6402648632 |
| C  | 7.2842236567  | 2.5976561768  | 4.8296340053 |
| C  | 7.9375708534  | 1.4404012697  | 5.2817289302 |
| C  | 9.3103588830  | 1.5092742342  | 5.5471026982 |
| C  | 10.3307309852 | 4.9127622710  | 4.7422752426 |
| C  | 9.8491962505  | 6.2300647686  | 4.2172595707 |
| C  | 10.1925472337 | 0.4395809848  | 6.0652042242 |
| C  | 9.6388293222  | -0.9197402509 | 6.3576544084 |
| C  | 12.6249942630 | 5.6137877123  | 4.9780380637 |
| C  | 13.6418689767 | 5.4943873593  | 4.0154510131 |
| C  | 14.6322719651 | 6.4788029800  | 3.9316794463 |
| C  | 14.6226159779 | 7.5710658533  | 4.8103994296 |
| C  | 13.6078563492 | 7.6860100395  | 5.7697178263 |

|   |               |               |              |
|---|---------------|---------------|--------------|
| C | 12.6058944669 | 6.7135643478  | 5.8546472488 |
| C | 12.4282126782 | -0.0911684349 | 6.8110489292 |
| C | 13.1685591546 | -0.9407418870 | 5.9728188541 |
| C | 14.1043937577 | -1.8172672866 | 6.5353138287 |
| C | 14.3057254439 | -1.8431903434 | 7.9219605272 |
| C | 13.5642442396 | -0.9914702515 | 8.7519582417 |
| C | 12.6263032338 | -0.1099147864 | 8.2022759372 |
| H | 7.4966163129  | 4.6817286011  | 4.2927572013 |
| H | 6.2202366800  | 2.5705651446  | 4.6243524625 |
| H | 7.3874651251  | 0.5187060250  | 5.4243348060 |
| H | 10.6721849034 | 6.8757923939  | 3.9135463870 |
| H | 9.1890454754  | 6.0779250549  | 3.3563222806 |
| H | 9.2663053813  | 6.7646820197  | 4.9794223302 |
| H | 10.3901631245 | -1.5899426077 | 6.7720343053 |
| H | 8.8063635614  | -0.8506007516 | 7.0690624588 |
| H | 9.2386383733  | -1.3732933823 | 5.4413808565 |
| H | 15.3988931131 | 6.4064715822  | 3.1680644094 |
| H | 15.3887309494 | 8.3343954295  | 4.7363728895 |
| H | 13.5856074250 | 8.5397108773  | 6.4378018014 |
| H | 14.6597417731 | -2.4930650165 | 5.8943164062 |
| H | 15.0217647651 | -2.5331653003 | 8.3535990796 |
| H | 13.7007821319 | -1.0272922182 | 9.8272423505 |
| H | 12.9944535021 | -0.9444084439 | 4.9023828654 |
| H | 12.0329623828 | 0.5285336233  | 8.8479849852 |
| H | 11.8045988711 | 6.8191725216  | 6.5771242765 |

|   |               |              |               |
|---|---------------|--------------|---------------|
| H | 13.6282573698 | 4.6754579526 | 3.3061945854  |
| N | 13.6604995941 | 2.7194341949 | 6.0453652225  |
| C | 14.0874528252 | 3.1129396179 | 7.2628425797  |
| C | 15.4606407116 | 3.1274184113 | 7.5440728675  |
| C | 16.3552082938 | 2.7126776963 | 6.5464580399  |
| C | 15.8773345273 | 2.2932220552 | 5.2951299193  |
| C | 14.4960219790 | 2.3101729291 | 5.0673955603  |
| C | 12.9721453223 | 3.4778257883 | 8.1630820233  |
| H | 15.8278346726 | 3.4499984735 | 8.5100955037  |
| H | 17.4210038474 | 2.7140398686 | 6.7440401309  |
| H | 16.5654580112 | 1.9660644884 | 4.5257825284  |
| C | 13.7716335929 | 1.9346202838 | 3.8324700124  |
| C | 14.5279832505 | 1.4679824139 | 2.6278550139  |
| H | 13.8785985029 | 1.3161096734 | 1.7673834395  |
| H | 15.3017089843 | 2.1963764358 | 2.3551530024  |
| H | 15.0426117991 | 0.5215039077 | 2.8402366126  |
| C | 13.2582391704 | 3.9104739851 | 9.5677785221  |
| H | 12.3587444649 | 3.9289612872 | 10.1818333647 |
| H | 13.9845947841 | 3.2346299376 | 10.0326389485 |
| H | 13.6978811160 | 4.9168878999 | 9.5850947941  |
| N | 12.4668252207 | 2.0735887028 | 3.9057365083  |
| N | 11.7747211266 | 3.3556036511 | 7.6291564167  |
| C | 9.9731799722  | 1.1652650011 | 0.5920547668  |
| C | 10.3531539152 | 2.4906333336 | 0.8443808106  |
| C | 11.1632229409 | 2.7968181238 | 1.9438629333  |

|   |               |               |               |
|---|---------------|---------------|---------------|
| C | 11.6017447634 | 1.7616637340  | 2.7865229646  |
| C | 11.2252318343 | 0.4307839530  | 2.5399233795  |
| C | 10.4108773454 | 0.1386877028  | 1.4393826747  |
| H | 9.3557382853  | 0.9322180544  | -0.2679307667 |
| H | 10.0371838426 | 3.2819603651  | 0.1736295155  |
| H | 11.4860130432 | 3.8174637700  | 2.1182969869  |
| H | 11.5844796639 | -0.3691600984 | 3.1784585174  |
| H | 10.1368189971 | -0.8899064129 | 1.2324740375  |
| C | 8.2788263642  | 4.4928349767  | 9.7615436968  |
| C | 8.5060680319  | 3.1441564412  | 9.4536280726  |
| C | 9.6491016929  | 2.7624868745  | 8.7429225931  |
| C | 10.5804177010 | 3.7385528411  | 8.3501416317  |
| C | 10.3626625526 | 5.0910227594  | 8.6693489742  |
| C | 9.2106139494  | 5.4630980054  | 9.3702125903  |
| H | 7.3940995524  | 4.7821030881  | 10.3169080661 |
| H | 7.8025395745  | 2.3886281202  | 9.7853059881  |
| H | 9.8386188100  | 1.7148766576  | 8.5423087201  |
| H | 11.0961199615 | 5.8394065059  | 8.3917181908  |
| H | 9.0501726972  | 6.5047870269  | 9.6249020292  |

[CoCl<sub>4</sub>]<sup>2-</sup>

|    |               |               |               |
|----|---------------|---------------|---------------|
| Co | 0.0000000000  | 0.0000000000  | 0.0000000000  |
| Cl | -1.3894744022 | 1.3894744022  | 1.3894744022  |
| Cl | -1.3894744022 | -1.3894744022 | -1.3894744022 |
| Cl | 1.3894744022  | 1.3894744022  | -1.3894744022 |

Cl 1.3894744022 -1.3894744022 1.3894744022

[CoCl<sub>4</sub>]<sup>3-</sup>

Co 0.0000000000 0.0000000000 0.0000000000

Cl -1.2909798591 1.2909719181 1.3572606066

Cl -1.2909798591 -1.2909719181 -1.3572606066

Cl 1.2909798591 1.2909719181 -1.3572606066

Cl 1.2909798591 -1.2909719181 1.3572606066

Cp<sub>2</sub>Fe<sup>0</sup>

C -1.7315576221 -1.0690216476 0.5900541787

C -1.7304477181 0.2302359624 1.1994698816

H -1.7147017115 0.4337448969 2.2593794294

C -1.7302999264 1.2113536241 0.1521253001

H -1.7148113806 2.2822723943 0.2861086016

C -1.7319315058 -0.8909327716 -0.8338888666

H -1.7175903757 -1.6787945261 -1.5715369735

C -1.7311321019 0.5183804478 -1.1045650134

H -1.7155293772 0.9766698022 -2.0816938533

C 1.7321297044 -1.2108485224 -0.1521544971

C 1.7319033533 -0.5178931441 1.1045541745

H 1.7167797745 -0.9763369223 2.0816335985

C 1.7307236113 0.8914170541 0.8338983072

H 1.7140454667 1.6792254353 1.5715607830

C 1.7308614703 -0.2296990500 -1.1994663299

|    |               |               |               |
|----|---------------|---------------|---------------|
| H  | 1.7148024532  | -0.4332342475 | -2.2593526954 |
| C  | 1.7301225138  | 1.0695405947  | -0.5900412147 |
| H  | 1.7133651075  | 2.0146884290  | -1.1110586666 |
| Fe | 0.0000068649  | -0.0007327857 | -0.0000015683 |
| H  | -1.7168844832 | -2.0142131721 | 1.1110767659  |
| H  | 1.7176344197  | -2.2817836863 | -0.2861033197 |

Cp<sub>2</sub>Fe<sup>+</sup>

|   |               |               |               |
|---|---------------|---------------|---------------|
| C | -1.7315576221 | -1.0690216476 | 0.5900541787  |
| C | -1.7304477181 | 0.2302359624  | 1.1994698816  |
| H | -1.7147017115 | 0.4337448969  | 2.2593794294  |
| C | -1.7302999264 | 1.2113536241  | 0.1521253001  |
| H | -1.7148113806 | 2.2822723943  | 0.2861086016  |
| C | -1.7319315058 | -0.8909327716 | -0.8338888666 |
| H | -1.7175903757 | -1.6787945261 | -1.5715369735 |
| C | -1.7311321019 | 0.5183804478  | -1.1045650134 |
| H | -1.7155293772 | 0.9766698022  | -2.0816938533 |
| C | 1.7321297044  | -1.2108485224 | -0.1521544971 |
| C | 1.7319033533  | -0.5178931441 | 1.1045541745  |
| H | 1.7167797745  | -0.9763369223 | 2.0816335985  |
| C | 1.7307236113  | 0.8914170541  | 0.8338983072  |
| H | 1.7140454667  | 1.6792254353  | 1.5715607830  |
| C | 1.7308614703  | -0.2296990500 | -1.1994663299 |
| H | 1.7148024532  | -0.4332342475 | -2.2593526954 |
| C | 1.7301225138  | 1.0695405947  | -0.5900412147 |

|    |               |               |               |
|----|---------------|---------------|---------------|
| H  | 1.7133651075  | 2.0146884290  | -1.1110586666 |
| Fe | 0.0000068649  | -0.0007327857 | -0.0000015683 |
| H  | -1.7168844832 | -2.0142131721 | 1.1110767659  |
| H  | 1.7176344197  | -2.2817836863 | -0.2861033197 |
